# Supplementary material for: Nickel-catalyzed regioselective C–H halogenation of electron-deficient arenes
Source: Royal Society of Chemistry journal article supplement (doi:10.1039/c8nj06023a), 2019-01-01

Electronic Supplementary Material (ESI) for New Journal of Chemistry.

This journal is © The Royal Society of Chemistry and the Centre National de la Recherche Scientifique 2019

## Supporting Information

### **Nickel-Catalyzed Regioselective C–H Halogenation of Electron-Deficient Arenes**

Ze-lin Li<sup>a</sup>, Peng-yu Wu<sup>a</sup>, and Chun Cai<sup>\*a</sup>

<sup>a</sup> Chemical Engineering College, Nanjing University of Science and Technology, Nanjing 210094, People's Republic of China

Fax: (+86)-25-8431-5030; phone: (+86)-25-8431-5514; e-mail: c.cai@njust.edu.cn

|                                 |          |
|---------------------------------|----------|
| <b>1. General information</b>   | <b>2</b> |
| <b>2. General procedure</b>     | <b>2</b> |
| <b>3. Characterization data</b> | <b>3</b> |
| <b>4. NMR spectra</b>           | <b>9</b> |

## 1. General information

All compounds are characterized by  $^1\text{H}$  NMR,  $^{13}\text{C}$  NMR and MS. Analytical thin-layer chromatography is performed on glass plates precoated with silica gel impregnated with a fluorescent indicator (254 nm), and the plates are visualized by exposure to ultraviolet light.  $^1\text{H}$  NMR and  $^{13}\text{C}$  NMR spectra are recorded on an AVANCE 500 Bruker spectrometer operating at 500 MHz and 125 MHz in  $\text{CDCl}_3$ , respectively, and chemical shifts are reported in ppm. GC analyses are performed on an Agilent 7890A instrument (Column: Agilent 19091J-413:30 m  $\times$  320  $\mu\text{m}$   $\times$  0.25  $\mu\text{m}$ , H, FID detection). GC-MS data was recorded on a 5975C Mass Selective Detector, coupled with a 7890A Gas Chromatograph (Agilent Technologies).

## 2. General procedure

**General procedure for the synthesis of mono-bromination product:** To a mixture of benzamide (0.5 mmol) **1a**,  $\text{Ni}(\text{OAc})_2$  (15%mmol),  $\text{AgSbF}_6$  (0.2 equiv),  $\text{TfOH}$  (0.5 equiv), and DCE (1.5ml) in a reaction tube was added N-bromosuccinimide (NBS) (1.5 equiv.). The reaction mixture was stirred at 80°C for 12h. The reaction mixture was extracted with ethyl acetate (15 mL  $\times$  3). The combined organic layers were washed with brine, dried over  $\text{MgSO}_4$ , and concentrated in vacuo. The residue was purified by column chromatography on silica gel to afford the desired products **3a**.

**General procedure for the synthesis of di-bromination product:** To a mixture of benzamide (0.5 mmol) **1a**,  $\text{Ni}(\text{OAc})_2$  (15%mmol),  $\text{AgSbF}_6$  (0.2 equiv),  $\text{TfOH}$  (0.5 equiv), and DCE (1.5ml) in a reaction tube was added N-bromosuccinimide (NBS) (2.5 equiv.). The reaction mixture was stirred at 80°C for 36h. The reaction mixture was extracted with ethyl acetate (15 mL  $\times$  3). The combined organic layers were washed with brine, dried over  $\text{MgSO}_4$ , and concentrated in vacuo. The residue was purified by column chromatography on silica gel to afford the desired products **5a**.

### 3.Characterization data

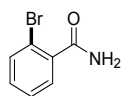

Formula: C<sub>7</sub>H<sub>6</sub>BrNO

Mass: 199

**2-bromobenzamide (3a):** The crude product was purified by column chromatography on silica gel (petroleum ether/ethyl acetate = 5:1) to give **3a** as white solid (81.59mg, 82%). <sup>1</sup>H NMR (500 MHz, Chloroform-*d*) δ 7.73 – 7.63 (m, 2H), 7.46 – 7.41 (m, 1H), 7.38 – 7.33 (m, 1H), 6.16 (s, 1H), 6.02 (s, 1H). <sup>13</sup>C NMR (126 MHz, Chloroform-*d*) δ 168.1, 135.6, 132.6, 130.7, 129.0, 126.6, 118.2. GC-MS (EI) *m/z*: 199.

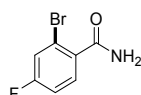

Formula: C<sub>7</sub>H<sub>5</sub>BrFNO

Mass: 217

**2-bromo-4-fluorobenzamide (3b):** The crude product was purified by column chromatography on silica gel (petroleum ether/ethyl acetate = 5:1) to give **3b** as white solid (85.72mg, 79%). <sup>1</sup>H NMR (500 MHz, Chloroform-*d*) δ 7.71 (dd, *J* = 8.7, 6.0 Hz, 1H), 7.37 (dd, *J* = 8.2, 2.5 Hz, 1H), 7.14 – 7.08 (m, 1H), 6.16 (s, 1H), 6.03 (s, 1H). <sup>13</sup>C NMR (126 MHz, Chloroform-*d*) δ 7.71 (dd, *J* = 8.7, 6.0 Hz, 1H), 7.37 (dd, *J* = 8.2, 2.5 Hz, 1H), 7.14 – 7.08 (m, 1H), 6.14 (s, 1H), 6.04 (s, 1H). <sup>13</sup>C NMR (126 MHz, Chloroform-*d*) δ 167.1, 163.2, 131.7, 130.9, 120.1, 119.9, 114.1, 114.0. GC-MS (EI) *m/z*: 217.

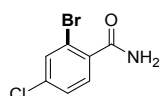

Formula: C<sub>7</sub>H<sub>5</sub>BrClNO

Mass: 233

**2-bromo-4-chlorobenzamide (3c):** The crude product was purified by column chromatography on silica gel (petroleum ether/ethyl acetate = 5:1) to give **3c** as white solid (89.71mg, 77%). <sup>1</sup>H NMR (500 MHz, Chloroform-*d*) δ 7.68 – 7.58 (m, 2H), 7.38 (dd, *J* = 8.3, 2.0 Hz, 1H), 6.15 (s, 1H), 6.00 (s, 1H). <sup>13</sup>C NMR (126 MHz, Chloroform-*d*) δ 167.2, 136.2, 133.9, 132.3, 130.1, 127.0, 118.8. GC-MS (EI) *m/z*: 233.

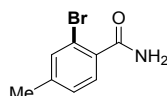

Formula: C<sub>8</sub>H<sub>8</sub>BrNO

Mass: 213

**2-bromo-4-methylbenzamide (3d):** The crude product was purified by column chromatography on silica gel (petroleum ether/ethyl acetate = 5:1) to give **3d** as white solid (72.42mg, 68%). <sup>1</sup>H NMR (500 MHz, DMSO-*d*<sub>6</sub>) δ 7.72 (s, 1H), 7.43 (s, 2H), 7.25 (d, *J* = 7.7 Hz, 1H), 7.19 – 7.14 (m, 1H), 2.27 (s, 3H). <sup>13</sup>C NMR (126 MHz, DMSO-*d*<sub>6</sub>) δ 168.5, 140.2, 135.8, 132.4, 127.9, 127.5, 118.0, 19.8. GC-MS (EI) *m/z*: 213.

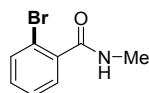

Formula: C<sub>8</sub>H<sub>8</sub>BrNO

Mass: 213

**2-bromo-N-methylbenzamide (3e):** The crude product was purified by column chromatography on silica gel (petroleum ether/ethyl acetate = 5:1) to give **3e** as white solid (77.75mg, 73%). <sup>1</sup>H NMR (500 MHz, Chloroform-*d*) δ 7.63 (dd, *J* = 8.0, 1.2 Hz, 1H), 7.57 (dd, *J* = 7.6, 1.8 Hz, 1H), 7.42 – 7.37 (m, 1H), 7.33 – 7.29 (m, 1H), 6.07 (s,

1H), 3.07 (d,  $J = 4.9$  Hz, 3H).  $^{13}\text{C}$  NMR (126 MHz, Chloroform- $d$ )  $\delta$  167.3, 136.9, 132.4, 130.2, 128.6, 126.6, 118.3, 25.8. GC-MS (EI)  $m/z$ : 213.

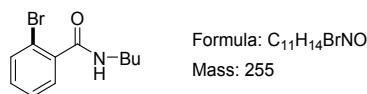

**2-bromo-N-(tert-butyl)benzamide (3f):** The crude product was purified by column chromatography on silica gel (petroleum ether/ethyl acetate = 5:1) to give **3f** as white solid (89.25mg, 70%).  $^1\text{H}$  NMR (500 MHz, Chloroform- $d$ )  $\delta$  7.56 (dd,  $J = 8.0, 1.2$  Hz, 1H), 7.50 – 7.48 (m, 1H), 7.35 – 7.31 (m, 1H), 7.26 – 7.21 (m, 1H), 5.73 (s, 1H), 1.48 (s, 9H).  $^{13}\text{C}$  NMR (126 MHz, Chloroform- $d$ )  $\delta$  166.0, 138.1, 132.2, 130.8, 129.9, 128.3, 126.5, 51.3, 27.8. GC-MS (EI)  $m/z$ : 255.

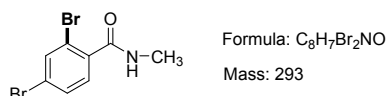

**2,4-dibromo-N-methylbenzamide (3g):** The crude product was purified by column chromatography on silica gel (petroleum ether/ethyl acetate = 5:1) to give **3g** as white solid (92.30mg, 63%).  $^1\text{H}$  NMR (500 MHz, Chloroform- $d$ )  $\delta$  7.80 (d,  $J = 1.8$  Hz, 1H), 7.53 (dd,  $J = 8.2, 1.8$  Hz, 1H), 7.44 (d,  $J = 8.2$  Hz, 1H), 6.13 (s, 1H), 3.05 (d,  $J = 4.9$  Hz, 3H).  $^{13}\text{C}$  NMR (126 MHz, Chloroform- $d$ )  $\delta$  166.3, 135.7, 134.8, 133.0, 129.8, 123.5, 119.0, 25.8. GC-MS (EI)  $m/z$ : 293.

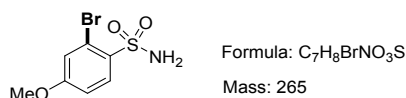

**2-bromo-4-methoxybenzenesulfonamide (3h):** The crude product was purified by column chromatography on silica gel (petroleum ether/ethyl acetate = 5:1) to give **3h** as white solid (91.43mg, 69%).  $^1\text{H}$  NMR (500 MHz, Chloroform- $d$ )  $\delta$  8.11 (d,  $J = 2.3$  Hz, 1H), 7.87 (dd,  $J = 8.6, 2.3$  Hz, 1H), 6.97 (d,  $J = 8.7$  Hz, 1H), 3.98 (s, 3H).  $^{13}\text{C}$  NMR (126 MHz, Chloroform- $d$ )  $\delta$  158.8, 133.8, 130.9, 126.6, 111.4, 110.4, 55.7. GC-MS (EI)  $m/z$ : 265.

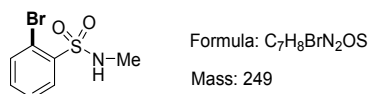

**2-bromo-N-methylbenzenesulfonamide (3i):** The crude product was purified by column chromatography on silica gel (petroleum ether/ethyl acetate = 5:1) to give **3i** as white solid (93.34mg, 75%).  $^1\text{H}$  NMR (500 MHz, Chloroform- $d$ )  $\delta$  8.20 (dd,  $J = 7.8, 1.8$  Hz, 1H), 7.79 (dd,  $J = 7.9, 1.3$  Hz, 1H), 7.60 – 7.29 (m, 3H), 2.66 (s, 3H).  $^{13}\text{C}$  NMR (126 MHz, Chloroform- $d$ )  $\delta$  136.6, 134.1, 132.8, 131.1, 126.9, 118.6, 28.3. GC-MS (EI)  $m/z$ : 249.

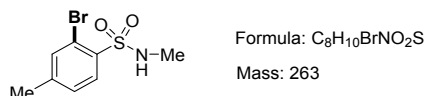

**2-bromo-N,4-dimethylbenzenesulfonamide (3j):** The crude product was purified by column chromatography on silica gel (petroleum ether/ethyl acetate = 5:1) to give **3j** as white solid (93.37mg, 71%).  $^1\text{H}$  NMR (500 MHz, Chloroform- $d$ )  $\delta$  8.01 (d,  $J = 8.1$  Hz,

1H), 7.56 (dd,  $J = 1.7, 0.8$  Hz, 1H), 7.28 – 7.26 (m, 1H), 2.60 (d,  $J = 5.4$  Hz, 3H), 2.41 (s, 3H).  $^{13}\text{C}$  NMR (126 MHz, Chloroform- $d$ )  $\delta$  144.1, 134.5, 133.6, 131.1, 127.5, 118.4, 28.3, 20.1. GC-MS (EI)  $m/z$ : 263.

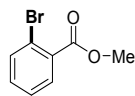

Formula:  $\text{C}_8\text{H}_7\text{BrO}_2$   
Mass: 214

**methyl 2-bromobenzoate (3k):** The crude product was purified by column chromatography on silica gel (petroleum ether/ethyl acetate = 5:1) to give **3k** as white solid (81.32mg, 76%).  $^1\text{H}$  NMR (500 MHz, Chloroform- $d$ )  $\delta$  7.77 (dd,  $J = 7.5, 2.0$  Hz, 1H), 7.64 (dd,  $J = 7.8, 1.5$  Hz, 1H), 7.38 – 7.27 (m, 2H), 3.92 (s, 3H).  $^{13}\text{C}$  NMR (126 MHz, Chloroform- $d$ )  $\delta$  165.6, 133.3, 131.6, 131.2, 130.3, 126.2, 120.6, 51.5. GC-MS (EI)  $m/z$ : 214.

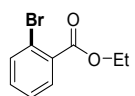

Formula:  $\text{C}_9\text{H}_9\text{BrO}_2$   
Mass: 228

**ethyl 2-bromobenzoate (3l):** The crude product was purified by column chromatography on silica gel (petroleum ether/ethyl acetate = 5:1) to give **3l** as white solid (74.90mg, 70%).  $^1\text{H}$  NMR (500 MHz, Chloroform- $d$ )  $\delta$  7.78 (dd,  $J = 7.6, 1.9$  Hz, 1H), 7.65 (dd,  $J = 7.8, 1.4$  Hz, 1H), 7.40 – 7.28 (m, 2H), 4.41 (q,  $J = 7.1$  Hz, 2H), 1.41 (t,  $J = 7.2$  Hz, 3H).  $^{13}\text{C}$  NMR (126 MHz, Chloroform- $d$ )  $\delta$  165.3, 133.3, 131.6, 131.4, 130.2, 126.2, 120.5, 60.6, 13.2. GC-MS (EI)  $m/z$ : 228.

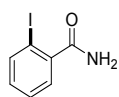

Formula:  $\text{C}_7\text{H}_6\text{INO}$   
Mass: 247

**2-iodobenzamide (4a):** The crude product was purified by column chromatography on silica gel (petroleum ether/ethyl acetate = 5:1) to give **4a** as white solid (100.04mg, 81%).  $^1\text{H}$  NMR (500 MHz, DMSO- $d_6$ )  $\delta$  7.85 (d,  $J = 7.9$  Hz, 1H), 7.80 (s, 1H), 7.49 (s, 1H), 7.41 (t,  $J = 7.4$  Hz, 1H), 7.33 (dd,  $J = 7.5, 1.7$  Hz, 1H), 7.13 (td,  $J = 7.6, 1.8$  Hz, 1H).  $^{13}\text{C}$  NMR (126 MHz, DMSO- $d_6$ )  $\delta$  170.1, 142.6, 138.6, 130.0, 127.4, 127.2, 92.6. GC-MS (EI)  $m/z$ : 247.

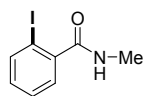

Formula:  $\text{C}_8\text{H}_8\text{INO}$   
Mass: 261

**2-iodo-N-methylbenzamide (4b):** The crude product was purified by column chromatography on silica gel (petroleum ether/ethyl acetate = 5:1) to give **4b** as white solid (99.18mg, 76%).  $^1\text{H}$  NMR (500 MHz, Chloroform- $d$ )  $\delta$  7.92 – 7.77 (m, 1H), 7.48 – 7.32 (m, 2H), 7.10 (m, 1H), 5.77 (s, 1H), 3.03 (d,  $J = 4.9$  Hz, 3H).  $^{13}\text{C}$  NMR (126 MHz, Chloroform- $d$ )  $\delta$  169.1, 141.4, 138.9, 130.1, 127.2, 126.8, 91.5, 25.8. GC-MS (EI)  $m/z$ : 261.

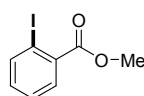

Formula:  $\text{C}_8\text{H}_7\text{IO}_2$   
Mass: 262

**methyl 2-iodobenzoate (4c):** The crude product was purified by column chromatography on silica gel (petroleum ether/ethyl acetate = 5:1) to give **4c** as white

solid (100.87mg, 77%).  $^1\text{H}$  NMR (500 MHz, Chloroform-*d*)  $\delta$  7.97 (dd,  $J$  = 8.0, 1.1 Hz, 1H), 7.78 (dd,  $J$  = 7.8, 1.7 Hz, 1H), 7.38 (td,  $J$  = 7.6, 1.1 Hz, 1H), 7.13 (td,  $J$  = 7.6, 1.8 Hz, 1H), 3.92 (s, 3H).  $^{13}\text{C}$  NMR (126 MHz, Chloroform-*d*)  $\delta$  165.9, 140.3, 134.1, 131.7, 130.0, 126.9, 93.1, 51.5. GC-MS (EI)  $m/z$ : 262.

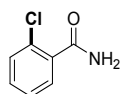

Formula:  $\text{C}_7\text{H}_6\text{ClNO}$

Mass: 155

**2-chlorobenzamide (4d):** The crude product was purified by column chromatography on silica gel (petroleum ether/ethyl acetate = 5:1) to give **4d** as white solid (54.25mg, 70%).  $^1\text{H}$  NMR (500 MHz, Chloroform-*d*)  $\delta$  7.85 – 7.74 (m, 1H), 7.57 – 7.32 (m, 3H), 6.69 (s, 1H), 6.46 (s, 1H).  $^{13}\text{C}$  NMR (126 MHz, Chloroform-*d*)  $\delta$  167.5, 132.9, 130.8, 129.9, 129.6, 129.4, 126.2. GC-MS (EI)  $m/z$ : 155.

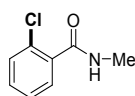

Formula:  $\text{C}_8\text{H}_8\text{ClNO}$

Mass: 169

**2-chloro-N-methylbenzamide (4e):** The crude product was purified by column chromatography on silica gel (petroleum ether/ethyl acetate = 5:1) to give **4e** as white solid (55.77mg, 66%).  $^1\text{H}$  NMR (500 MHz, Chloroform-*d*)  $\delta$  7.67 (dd,  $J$  = 7.3, 1.9 Hz, 1H), 7.41 – 7.32 (m, 3H), 6.24 (s, 1H), 3.03 (d,  $J$  = 4.9 Hz, 3H).  $^{13}\text{C}$  NMR (126 MHz, Chloroform-*d*)  $\delta$  166.2, 134.1, 130.3, 129.6, 129.2, 128.9, 126.1, 25.8. GC-MS (EI)  $m/z$ : 169.

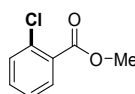

Formula:  $\text{C}_8\text{H}_7\text{ClO}_2$

Mass: 170

**methyl 2-chlorobenzoate (4f):** The crude product was purified by column chromatography on silica gel (petroleum ether/ethyl acetate = 5:1) to give **4f** as white solid (58.65mg, 69%).  $^1\text{H}$  NMR (500 MHz, Chloroform-*d*)  $\delta$  7.82 (dd,  $J$  = 7.8, 1.7 Hz, 1H), 7.42 (m, 2H), 7.30 (td,  $J$  = 7.5, 1.4 Hz, 1H), 3.93 (s, 3H).  $^{13}\text{C}$  NMR (126 MHz, Chloroform-*d*)  $\delta$  165.1, 132.7, 131.5, 130.4, 130.0, 129.1, 125.6, 51.4. GC-MS (EI)  $m/z$ : 170.

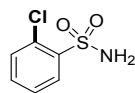

Formula:  $\text{C}_6\text{H}_6\text{ClNO}_2\text{S}$

Mass: 191

**2-chlorobenzenesulfonamide (4g):** The crude product was purified by column chromatography on silica gel (petroleum ether/ethyl acetate = 5:1) to give **4g** as white solid (67.81mg, 71%).  $^1\text{H}$  NMR (500 MHz, DMSO-*d*<sub>6</sub>)  $\delta$  7.97 (dd,  $J$  = 7.8, 1.7 Hz, 1H), 7.65 – 7.56 (m, 4H), 7.51 (td,  $J$  = 7.6, 1.5 Hz, 1H).  $^{13}\text{C}$  NMR (126 MHz, DMSO-*d*<sub>6</sub>)  $\delta$  140.5, 132.9, 131.0, 129.8, 128.4, 126.9. GC-MS (EI)  $m/z$ : 191.

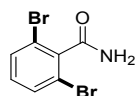

Formula:  $\text{C}_7\text{H}_5\text{Br}_2\text{NO}$

Mass: 279

**2,6-dibromobenzamide (5a):** The crude product was purified by column chromatography on silica gel (petroleum ether/ethyl acetate = 5:1) to give **5a** as white solid (104.63mg, 75%).  $^1\text{H}$  NMR (500 MHz, Chloroform-*d*)  $\delta$  7.56 (d,  $J$  = 8.1 Hz, 2H),

7.13 (t,  $J = 8.0$  Hz, 1H), 5.94 (s, 1H), 5.73 (s, 1H).  $^{13}\text{C}$  NMR (126 MHz, DMSO- $d_6$ )  $\delta$  166.3, 135.5, 132.5, 128.9, 127.8. GC-MS (EI)  $m/z$ : 279.

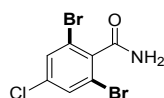

Formula:  $\text{C}_7\text{H}_4\text{Br}_2\text{ClNO}$   
Mass: 312

**2,6-dibromo-4-chlorobenzamide (5b):** The crude product was purified by column chromatography on silica gel (petroleum ether/ethyl acetate = 5:1) to give **5b** as white solid (112.32mg, 72%).  $^1\text{H}$  NMR (500 MHz, Chloroform- $d$ )  $\delta$  7.58 (s, 2H), 6.02 (s, 1H), 5.77 (s, 1H).  $^{13}\text{C}$  NMR (126 MHz, Chloroform- $d$ )  $\delta$  166.2, 136.8, 135.3, 130.7, 119.3. GC-MS (EI)  $m/z$ : 312.

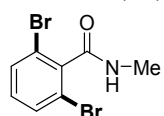

Formula:  $\text{C}_8\text{H}_7\text{Br}_2\text{NO}$   
Mass: 293

**2,6-dibromo-N-methylbenzamide (5c):** The crude product was purified by column chromatography on silica gel (petroleum ether/ethyl acetate = 5:1) to give **5c** as white solid (108.41mg, 74%).  $^1\text{H}$  NMR (500 MHz, Chloroform- $d$ )  $\delta$  7.57 (d,  $J = 8.1$  Hz, 2H), 7.14 (t,  $J = 8.1$  Hz, 1H), 5.79 (s, 1H), 3.09 (d,  $J = 4.9$  Hz, 3H).  $^{13}\text{C}$  NMR (126 MHz, Chloroform- $d$ )  $\delta$  166.1, 139.0, 130.8, 130.1, 119.5, 25.7. GC-MS (EI)  $m/z$ : 293.

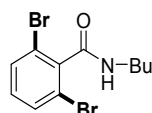

Formula:  $\text{C}_{11}\text{H}_{13}\text{Br}_2\text{NO}$   
Mass: 334

**2,6-dibromo-N-(tert-butyl)benzamide (5d):** The crude product was purified by column chromatography on silica gel (petroleum ether/ethyl acetate = 5:1) to give **5d** as white solid (115.23mg, 69%).  $^1\text{H}$  NMR (500 MHz, Chloroform- $d$ )  $\delta$  7.50 (d,  $J = 8.1$  Hz, 2H), 7.08 (d,  $J = 8.1$  Hz, 1H), 5.48 (s, 1H), 1.49 (s, 9H).  $^{13}\text{C}$  NMR (126 MHz, Chloroform- $d$ )  $\delta$  164.2, 139.4, 130.8, 130.0, 119.5, 51.6, 27.7. GC-MS (EI)  $m/z$ : 344.

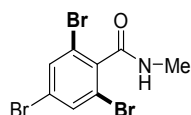

Formula:  $\text{C}_8\text{H}_6\text{Br}_3\text{NO}$   
Mass: 371

**2,4,6-tribromo-N-methylbenzamide (5e):** The crude product was purified by column chromatography on silica gel (petroleum ether/ethyl acetate = 5:1) to give **5e** as white solid (105.74mg, 57%).  $^1\text{H}$  NMR (500 MHz, Chloroform- $d$ )  $\delta$  7.74 (s, 2H), 5.83 (s, 1H), 3.08 (d,  $J = 5.0$  Hz, 3H).  $^{13}\text{C}$  NMR (126 MHz, Chloroform- $d$ )  $\delta$  165.4, 137.9, 133.3, 122.8, 120.0, 25.7. GC-MS (EI)  $m/z$ : 371.

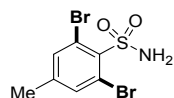

Formula:  $\text{C}_7\text{H}_7\text{Br}_2\text{NO}_2\text{S}$   
Mass: 329

**2,6-dibromo-4-methylbenzenesulfonamide (5f):** The crude product was purified by column chromatography on silica gel (petroleum ether/ethyl acetate = 5:1) to give **5f** as white solid (100.35mg, 61%).  $^1\text{H}$  NMR (500 MHz, Chloroform- $d$ )  $\delta$  8.28 (s, 1H), 7.61 (s, 1H), 5.18 (s, 2H), 2.45 (s, 3H).  $^{13}\text{C}$  NMR (126 MHz, Chloroform- $d$ )  $\delta$  143.8, 137.9, 135.5, 132.3, 21.8. GC-MS (EI)  $m/z$ : 329.

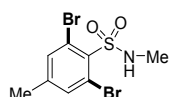

Formula:  $\text{C}_8\text{H}_9\text{Br}_2\text{NO}_2\text{S}$   
Mass: 343

**2,6-dibromo-N,4-dimethylbenzenesulfonamide (5g):** The crude product was purified by column chromatography on silica gel (petroleum ether/ethyl acetate = 5:1) to give **5g** as white solid (94.33mg, 55%). <sup>1</sup>H NMR (500 MHz, Chloroform-*d*) δ 8.27 (s, 1H), 7.60 (s, 1H), 5.03 (s, 1H), 2.64 (d, *J* = 5.4 Hz, 3H), 2.45 (s, 3H). <sup>13</sup>C NMR (126 MHz, Chloroform-*d*) δ 143.9, 135.6, 134.3, 123.2, 28.3, 21.8. GC-MS (EI) *m/z*: 343.

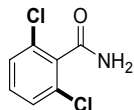

Formula: C<sub>7</sub>H<sub>5</sub>Cl<sub>2</sub>NO

Mass: 189

**2,6-dichlorobenzamide (5h):** The crude product was purified by column chromatography on silica gel (petroleum ether/ethyl acetate = 5:1) to give **5h** as white solid (66.15mg, 70%). <sup>1</sup>H NMR (500 MHz, DMSO-*d*<sub>6</sub>) δ 8.04 (s, 1H), 7.77 (s, 1H), 7.46 – 7.43 (m, 2H), 7.36 (dd, *J* = 8.9, 7.3 Hz, 1H). <sup>13</sup>C NMR (126 MHz, DMSO-*d*<sub>6</sub>) δ 164.8, 136.5, 130.2, 130.1, 127.5. GC-MS (EI) *m/z*: 189.

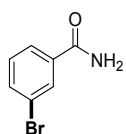

Formula: C<sub>7</sub>H<sub>6</sub>BrNO

Mass: 199

**3-bromobenzamide (3a<sub>0</sub>):** The crude product was purified by column chromatography on silica gel (petroleum ether/ethyl acetate = 5:1) to give **3a<sub>0</sub>** as white solid (82.59mg, 83%). <sup>1</sup>H NMR (500 MHz, Chloroform-*d*) δ 7.97 (d, *J* = 2.0 Hz, 1H), 7.73 (d, *J* = 7.8 Hz, 1H), 7.67 (dd, *J* = 7.9, 1.9 Hz, 1H), 7.34 (t, *J* = 7.9 Hz, 1H), 6.10 (s, 1H), 5.92 (s, 1H). <sup>13</sup>C NMR (126 MHz, DMSO-*d*<sub>6</sub>) δ 165.8, 135.9, 133.4, 130.0, 129.7, 126.0, 121.1. GC-MS (EI) *m/z*: 199.

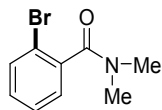

Formula: C<sub>9</sub>H<sub>10</sub>BrNO

Mass: 227

**2-bromo-N,N-dimethylbenzamide (3a'):** The crude product was purified by column chromatography on silica gel (petroleum ether/ethyl acetate = 5:1) to give **3a'** as white solid (87.39mg, 77%). <sup>1</sup>H NMR (500 MHz, Chloroform-*d*) δ 7.57 (dd, *J* = 8.0, 1.1 Hz, 1H), 7.36 (m, 1H), 7.27 – 7.22 (m, 2H), 3.14 (s, 3H), 2.86 (s, 3H). <sup>13</sup>C NMR (126 MHz, Chloroform-*d*) δ 168.3, 137.9, 133.0, 131.7, 129.2, 126.7, 118.2, 37.2, 33.7. GC-MS (EI) *m/z*: 227.

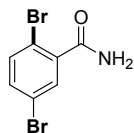

Formula: C<sub>7</sub>H<sub>5</sub>Br<sub>2</sub>NO

Mass: 279

**2,5-dibromobenzamide (3a<sub>0</sub>'):** The crude product was purified by column chromatography on silica gel (petroleum ether/ethyl acetate = 5:1) to give **3a<sub>0</sub>'** as white solid (99.05mg, 71%). <sup>1</sup>H NMR (500 MHz, DMSO-*d*<sub>6</sub>) δ 7.99 (s, 1H), 7.72 (s, 1H), 7.54 – 7.52 (m, 2H), 7.51 (s, 1H). <sup>13</sup>C NMR (126 MHz, Chloroform-*d*) δ 171.9, 143.9, 136.8, 136.6, 135.6, 133.7, 133.5. GC-MS (EI) *m/z*: 279.



## 4. NMR spectra

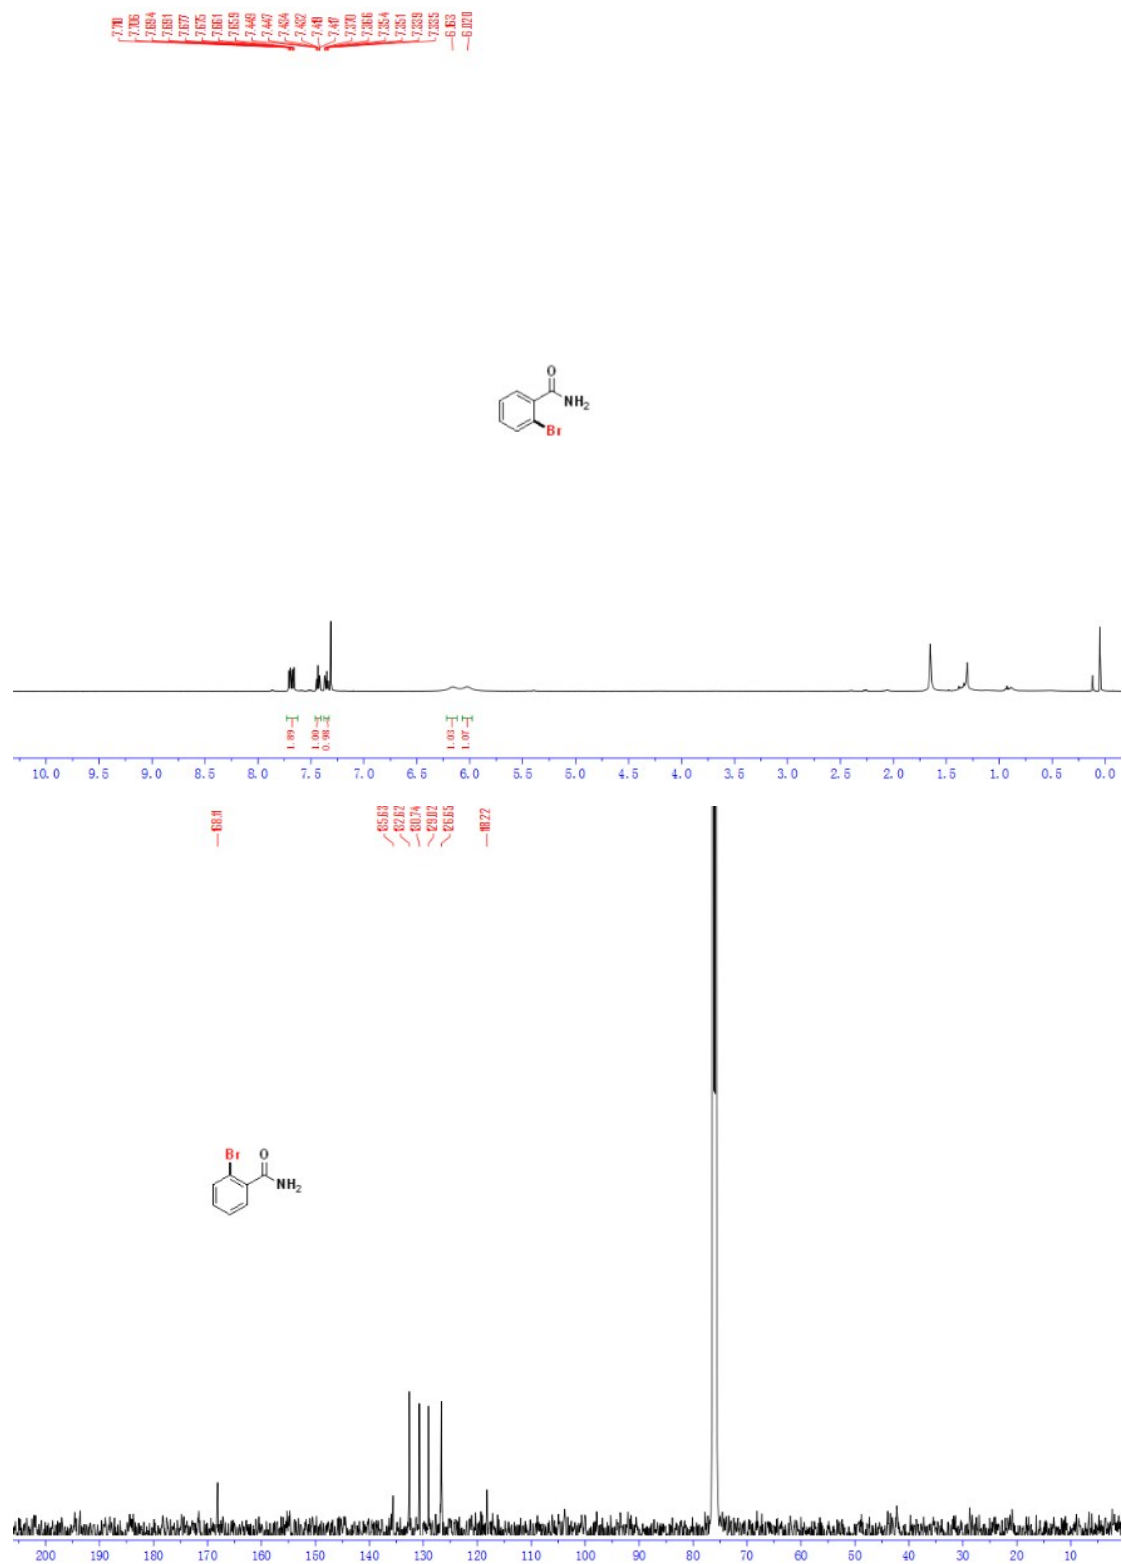

7.720  
7.708  
7.703  
7.691  
7.678  
7.675  
7.652  
7.651  
7.627  
7.622  
7.610  
7.600  
7.585  
7.574  
7.564  
7.559  
4.638  
4.643

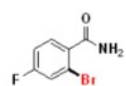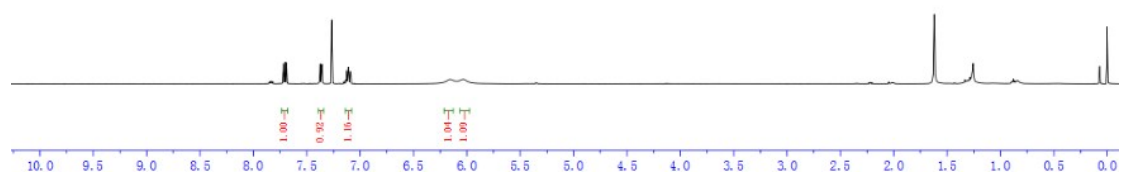

171.0  
163.4  
131.3  
130.9  
120.8  
119.8  
119.8

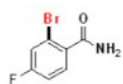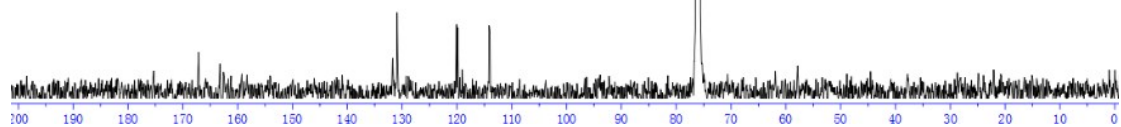

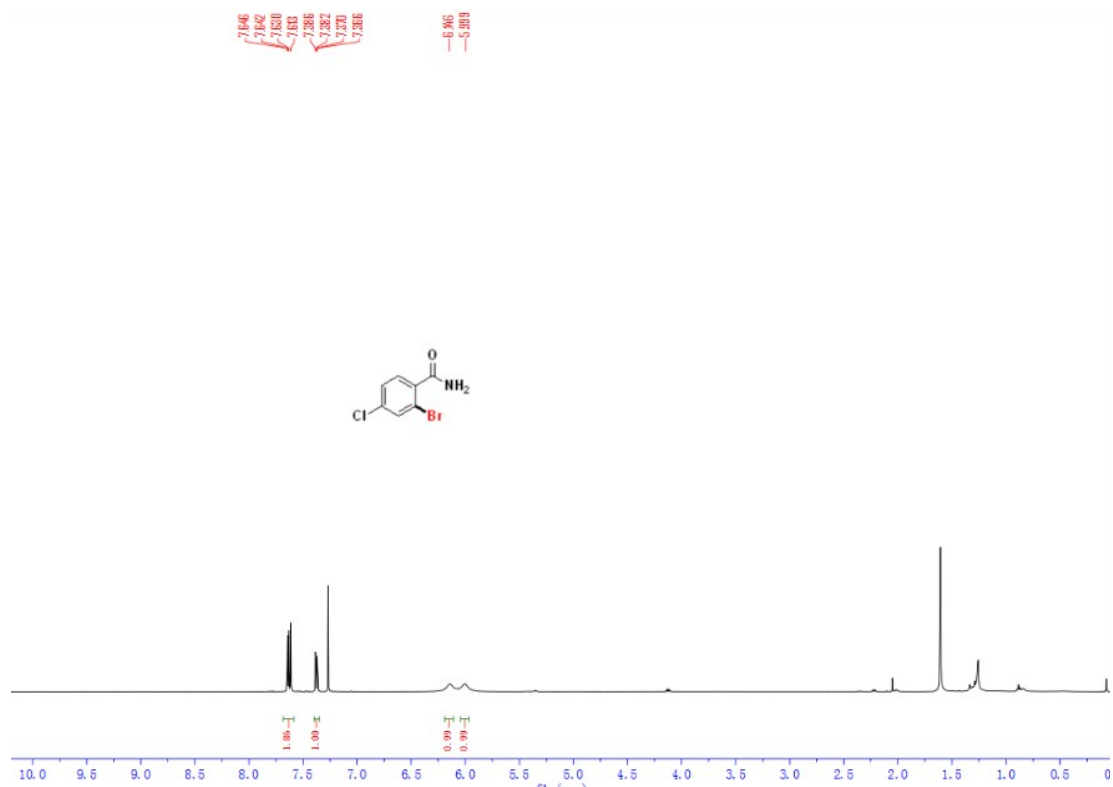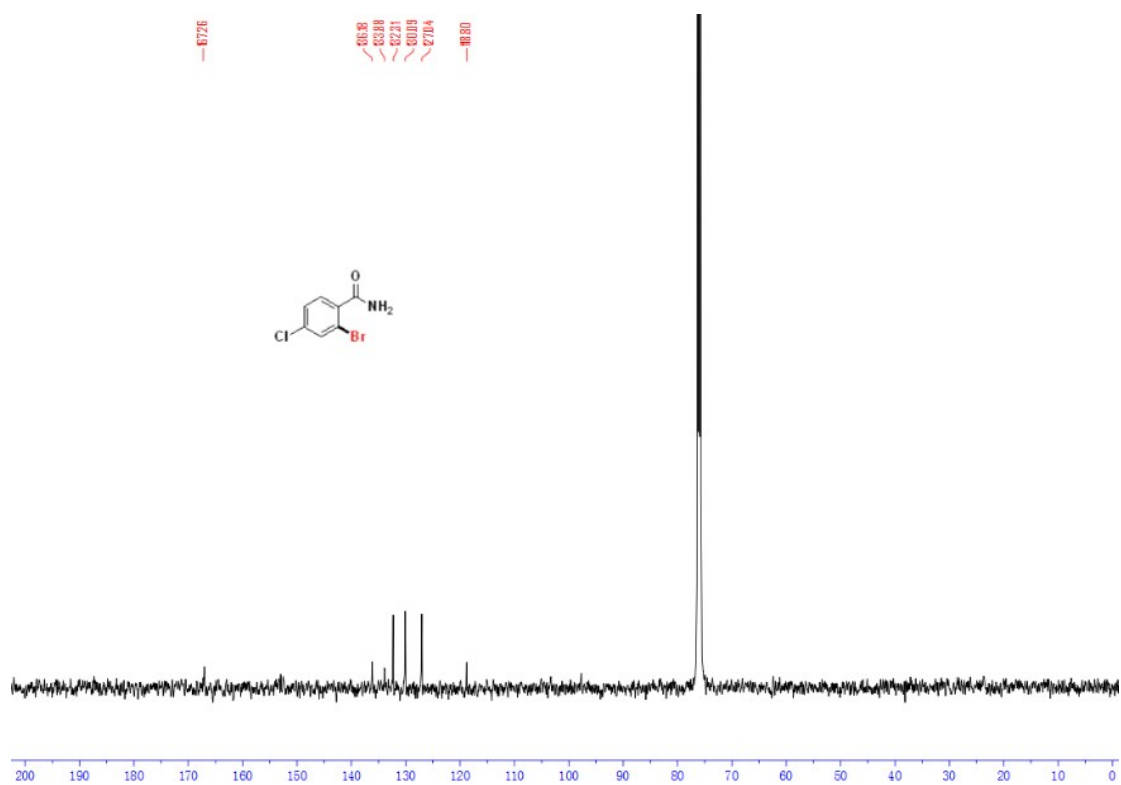

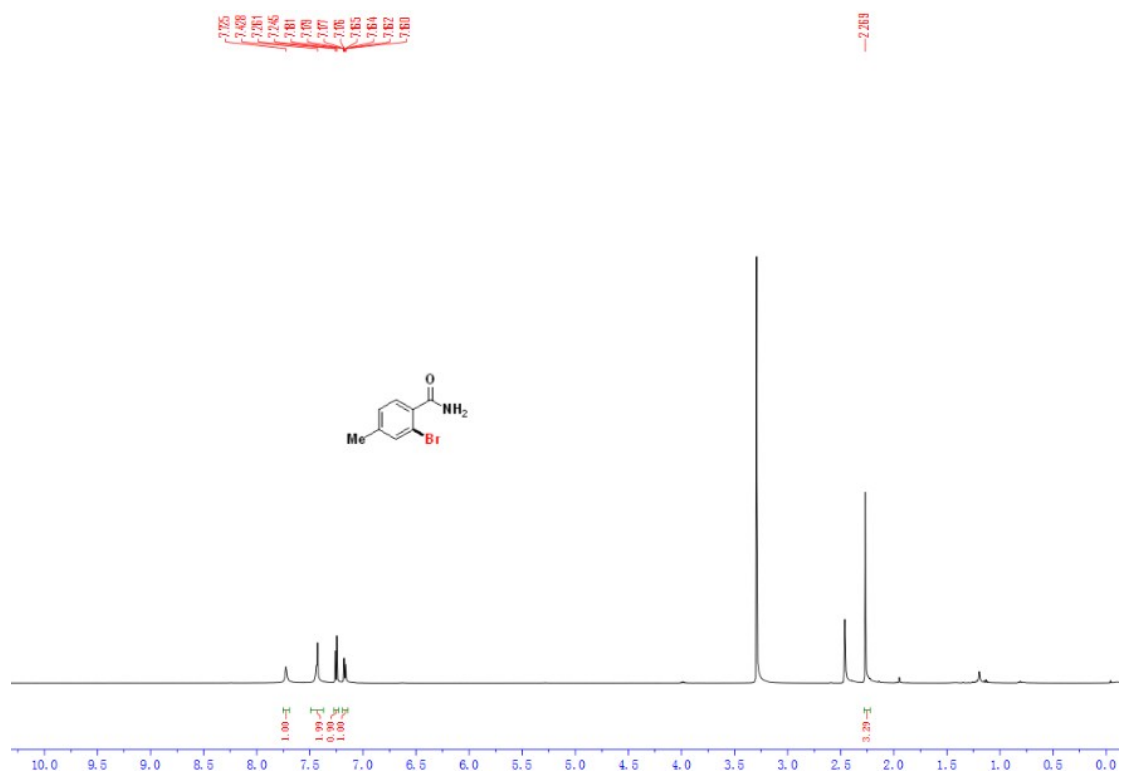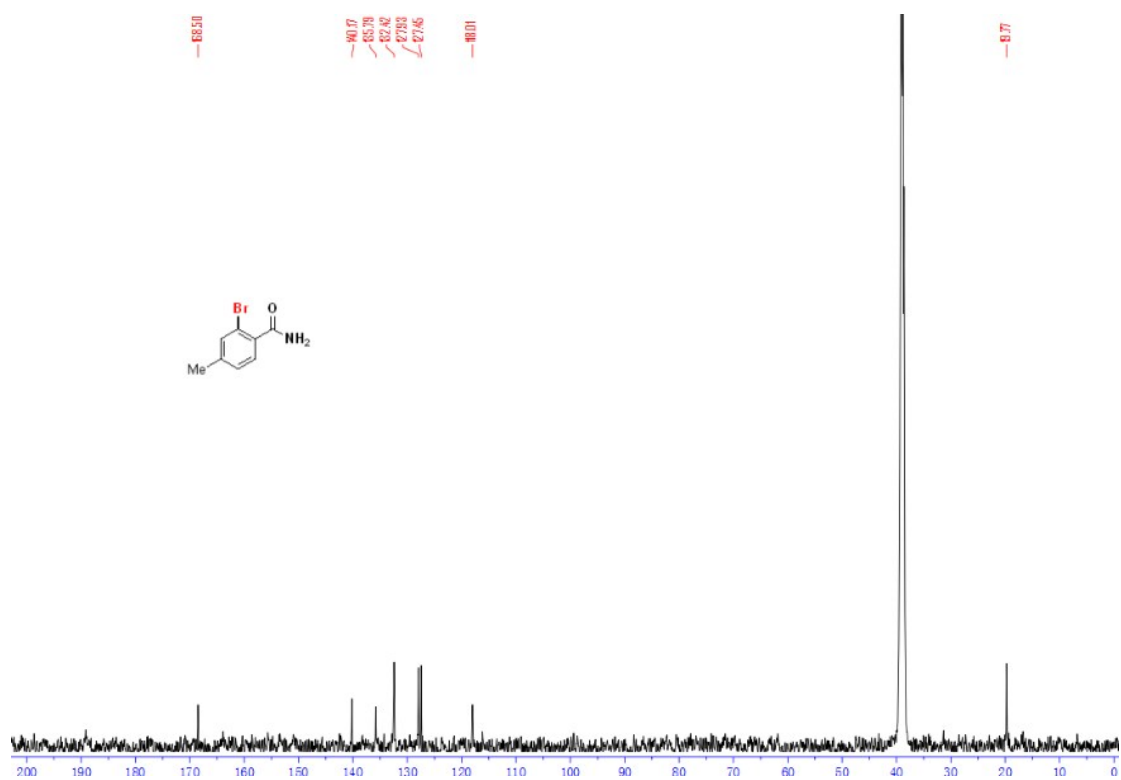

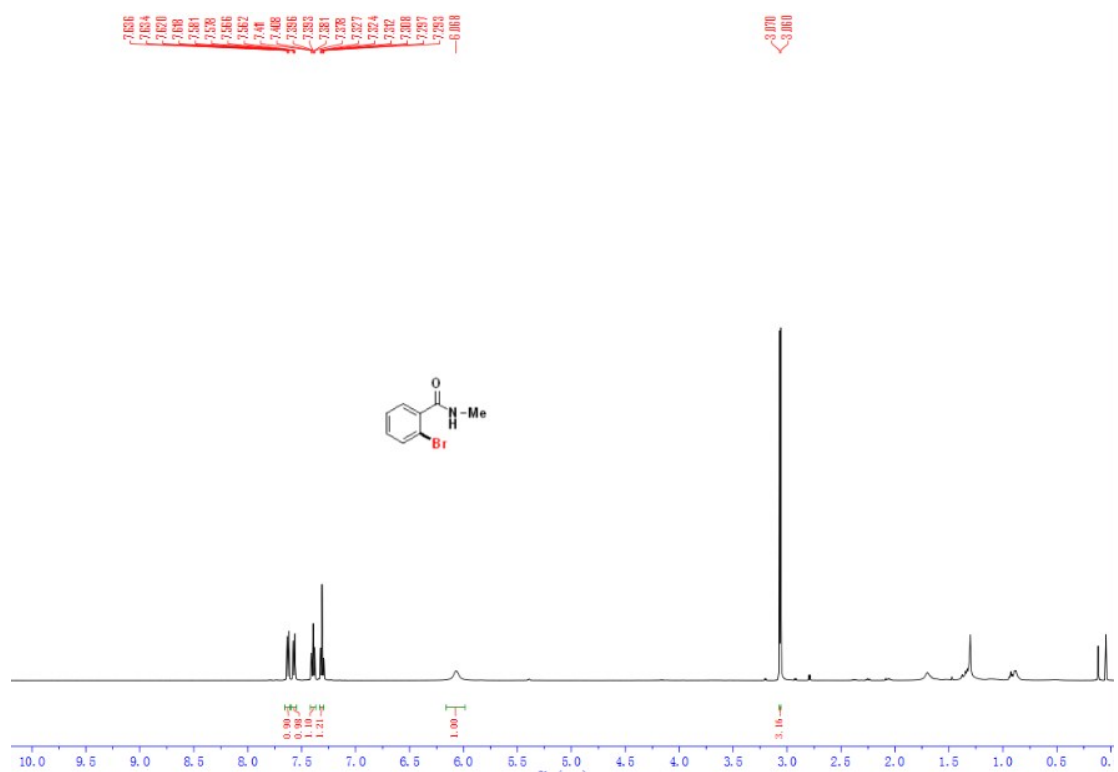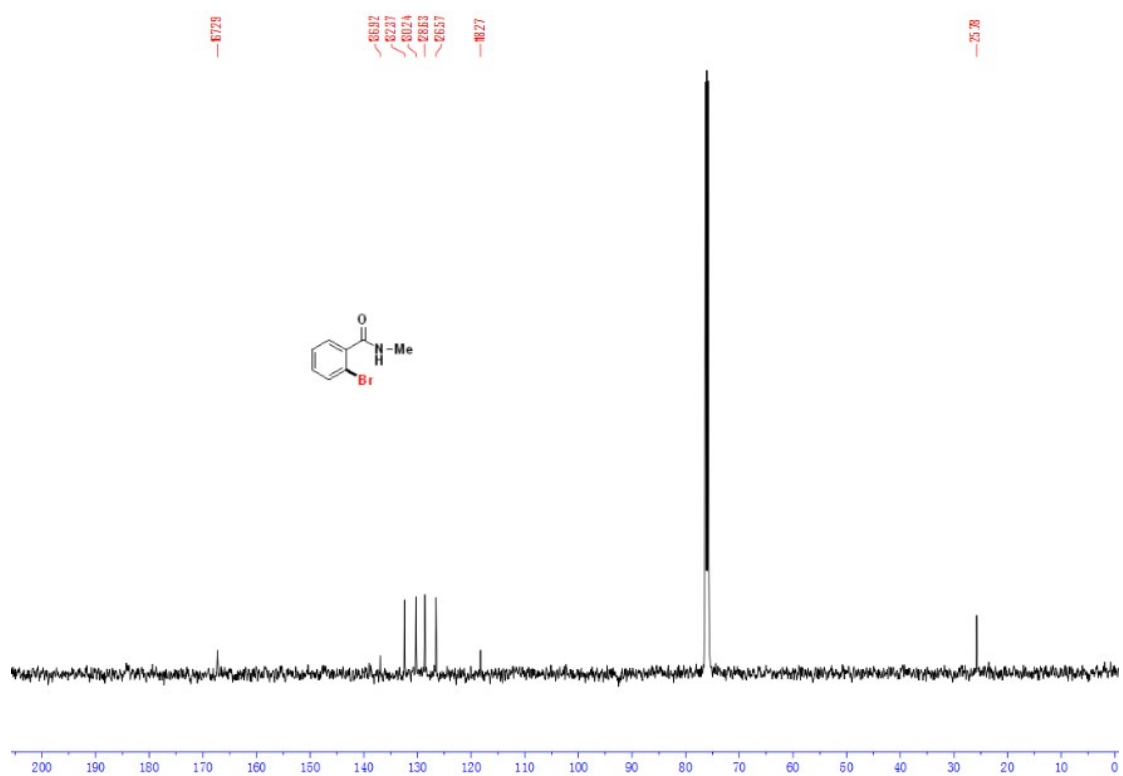

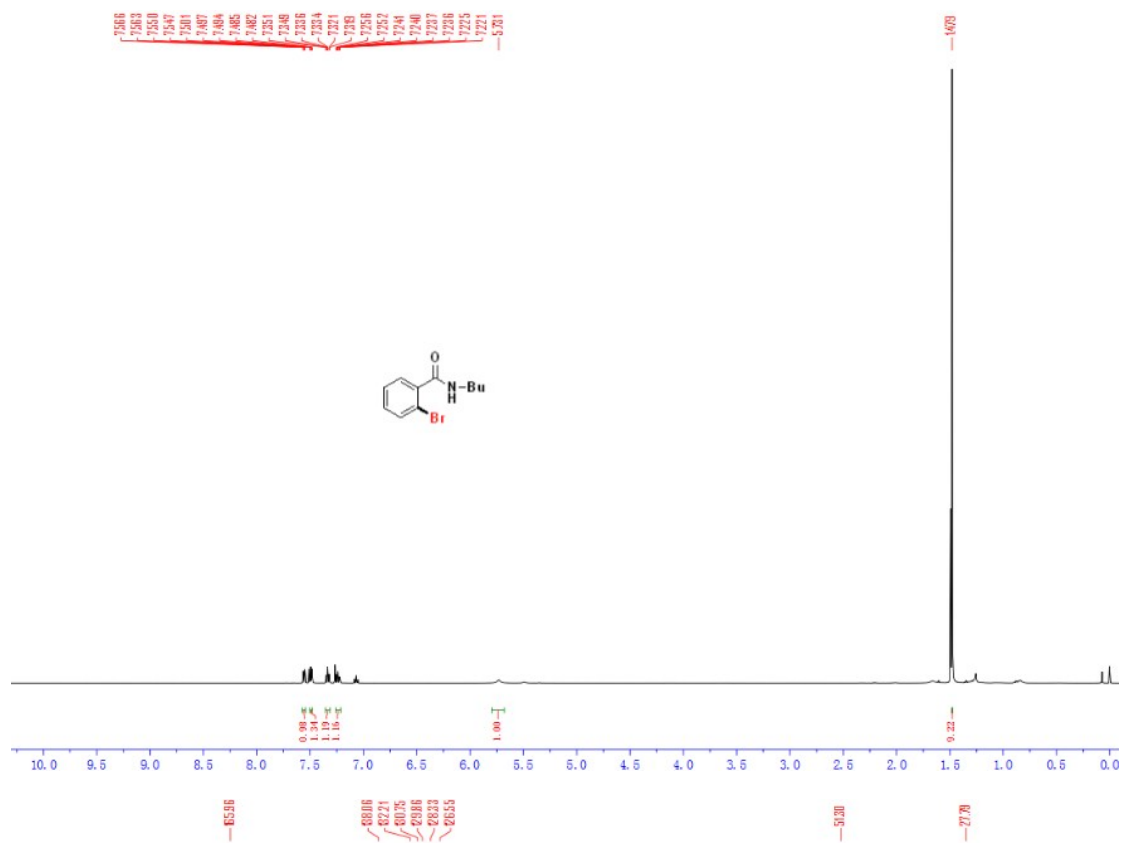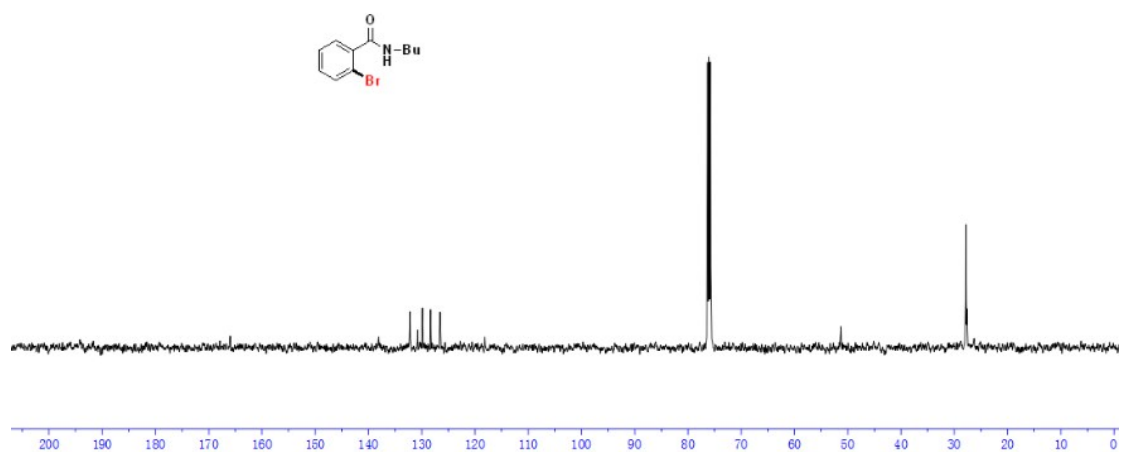

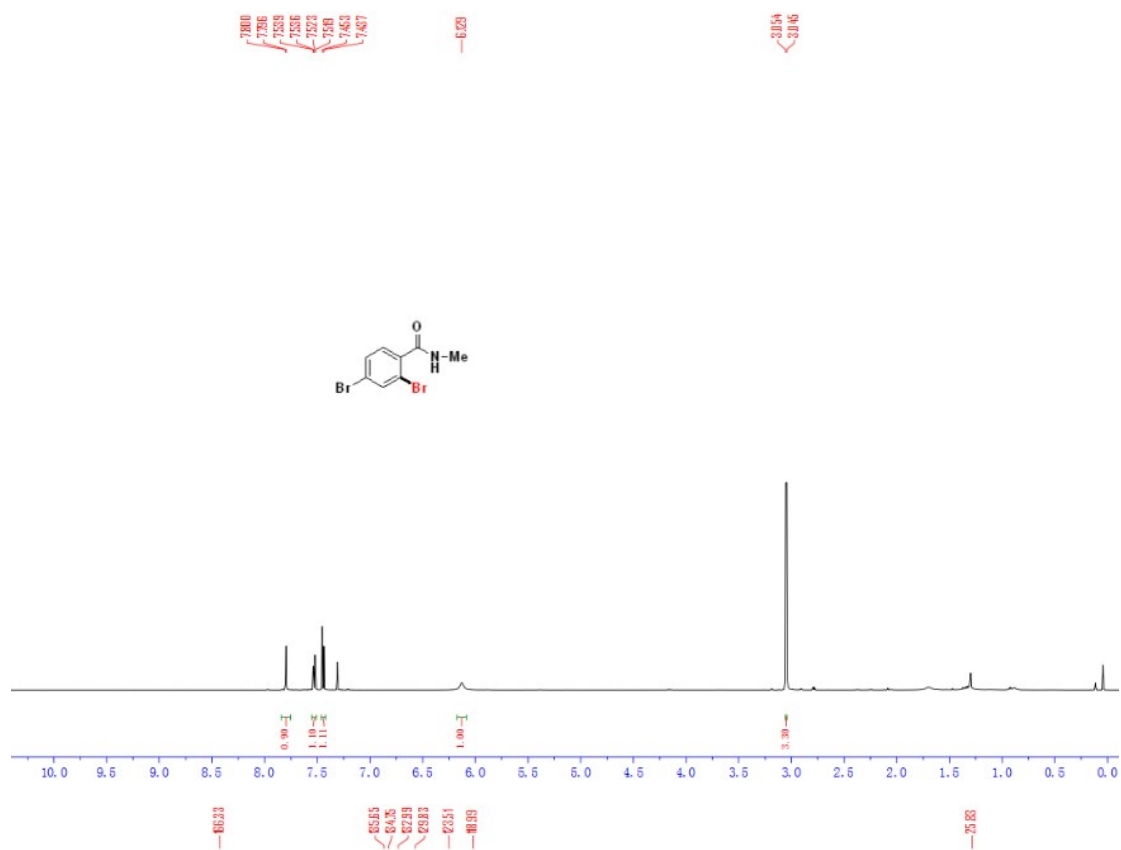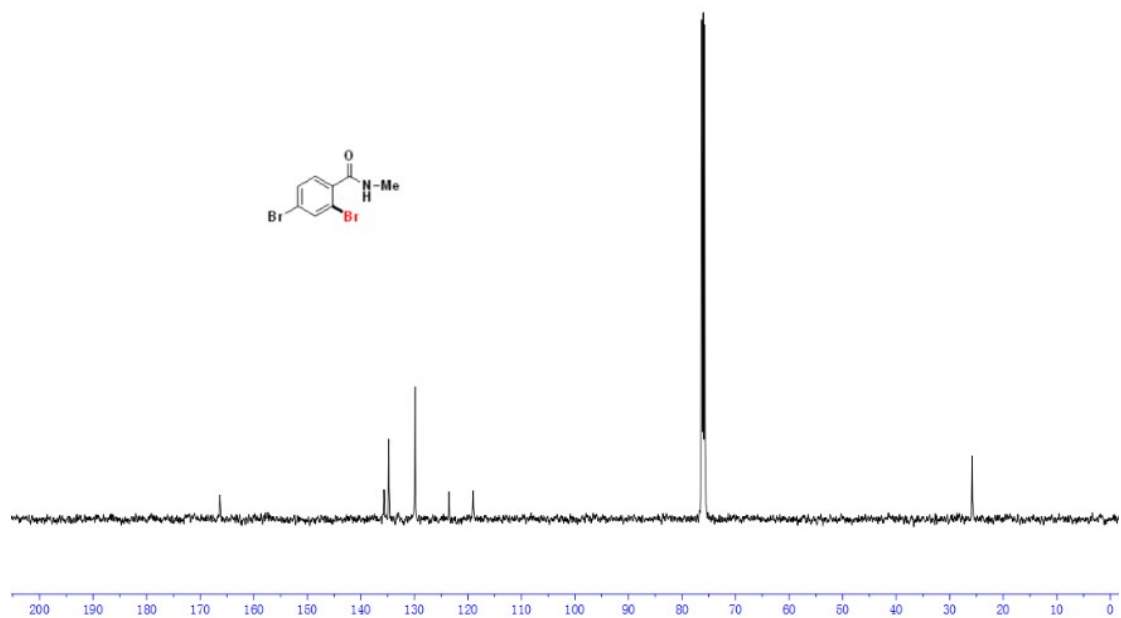

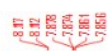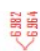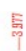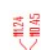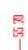



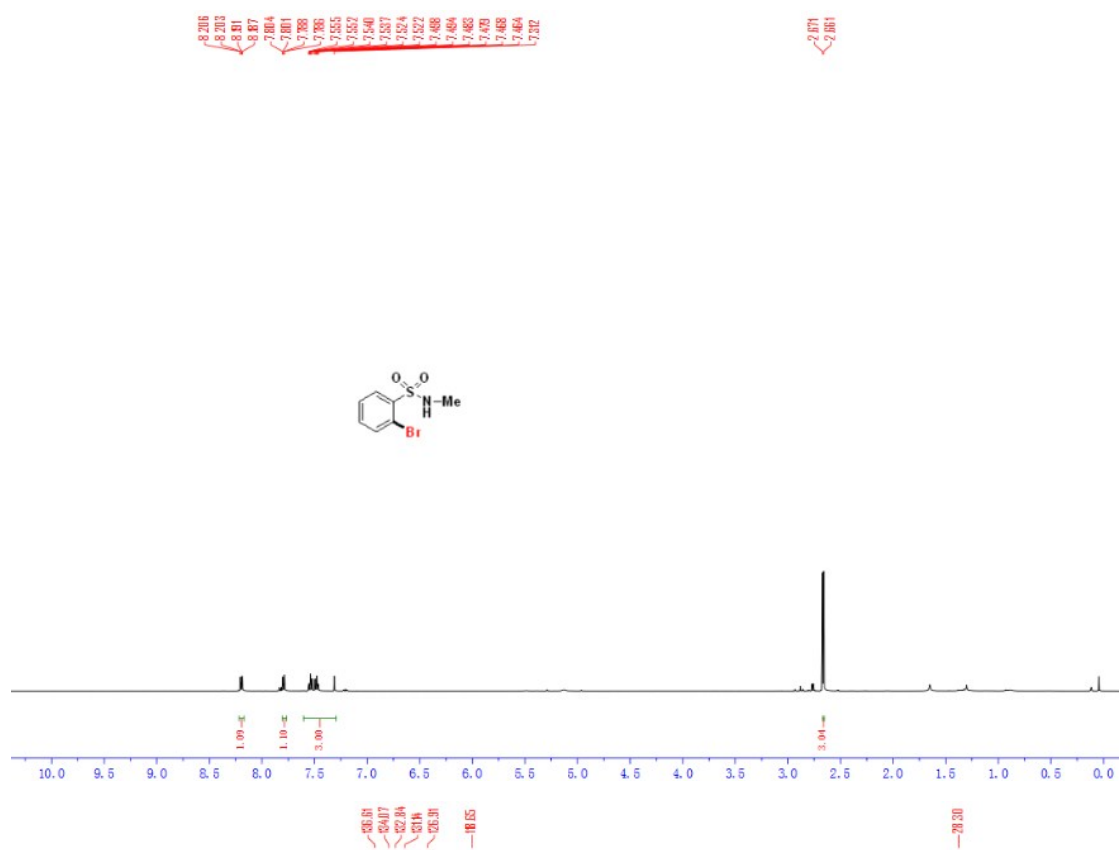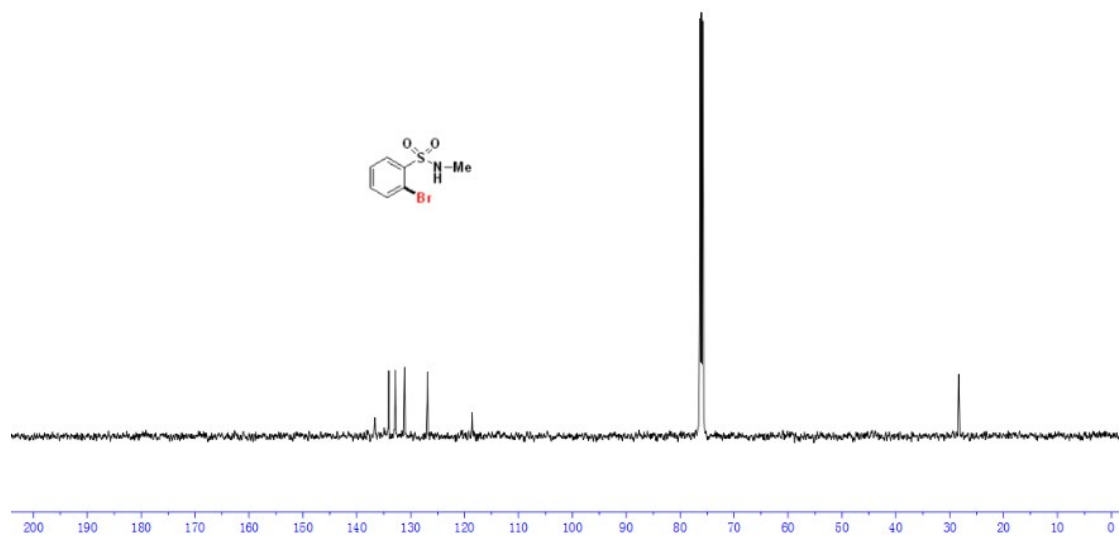

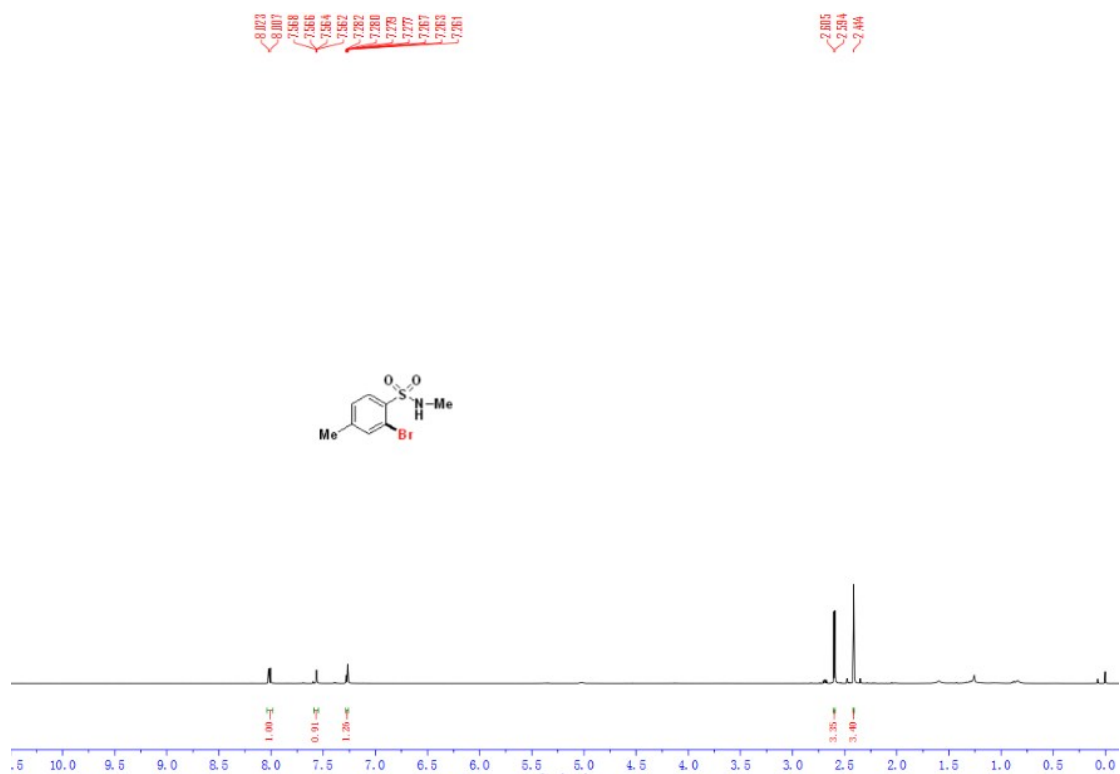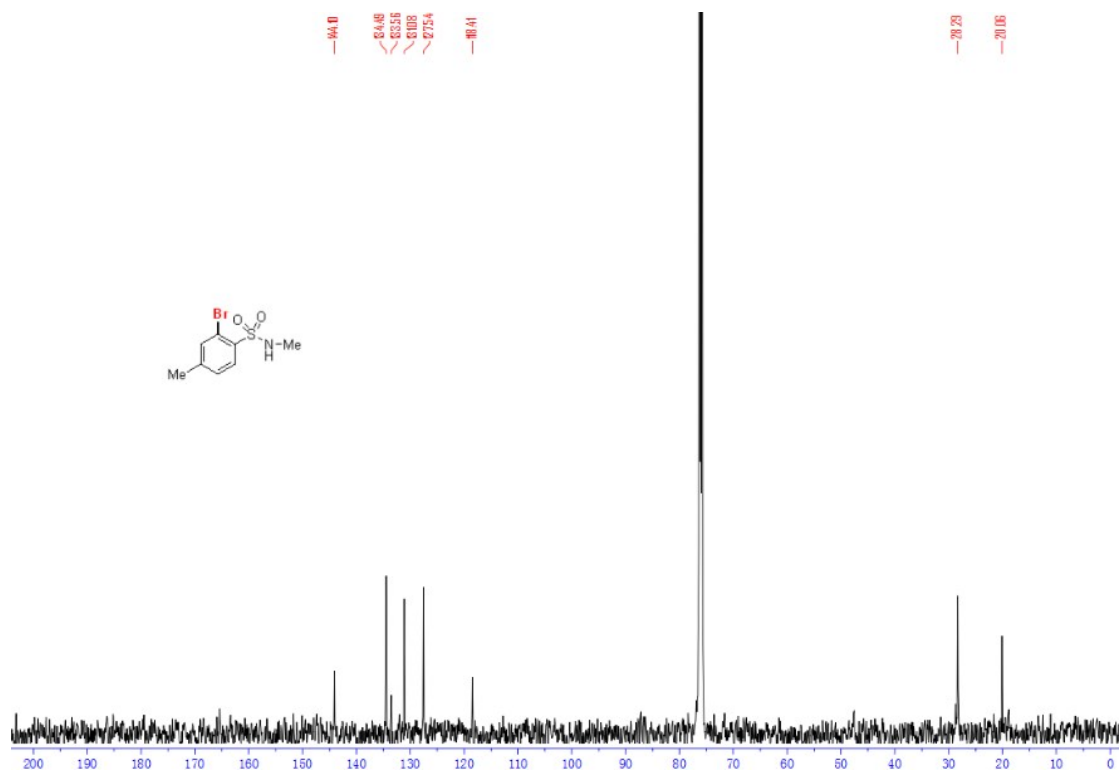

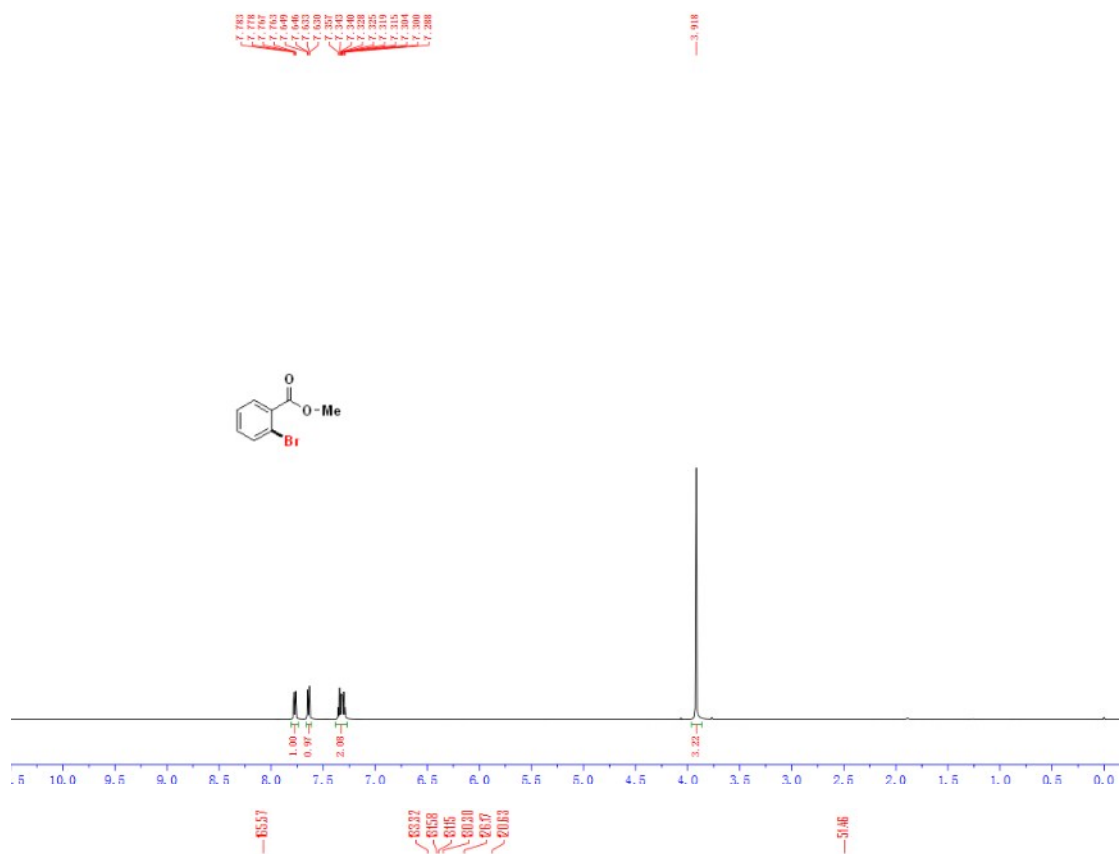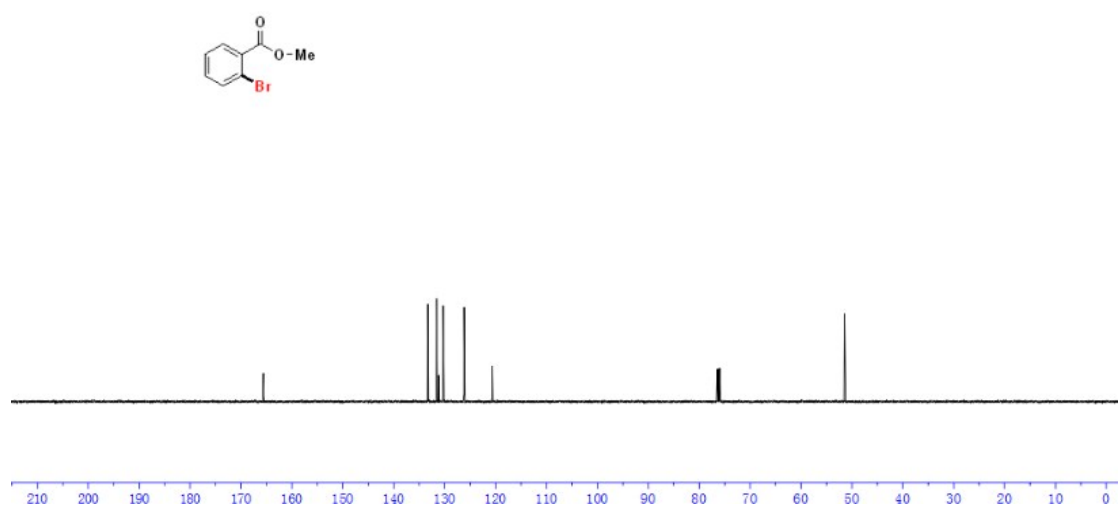

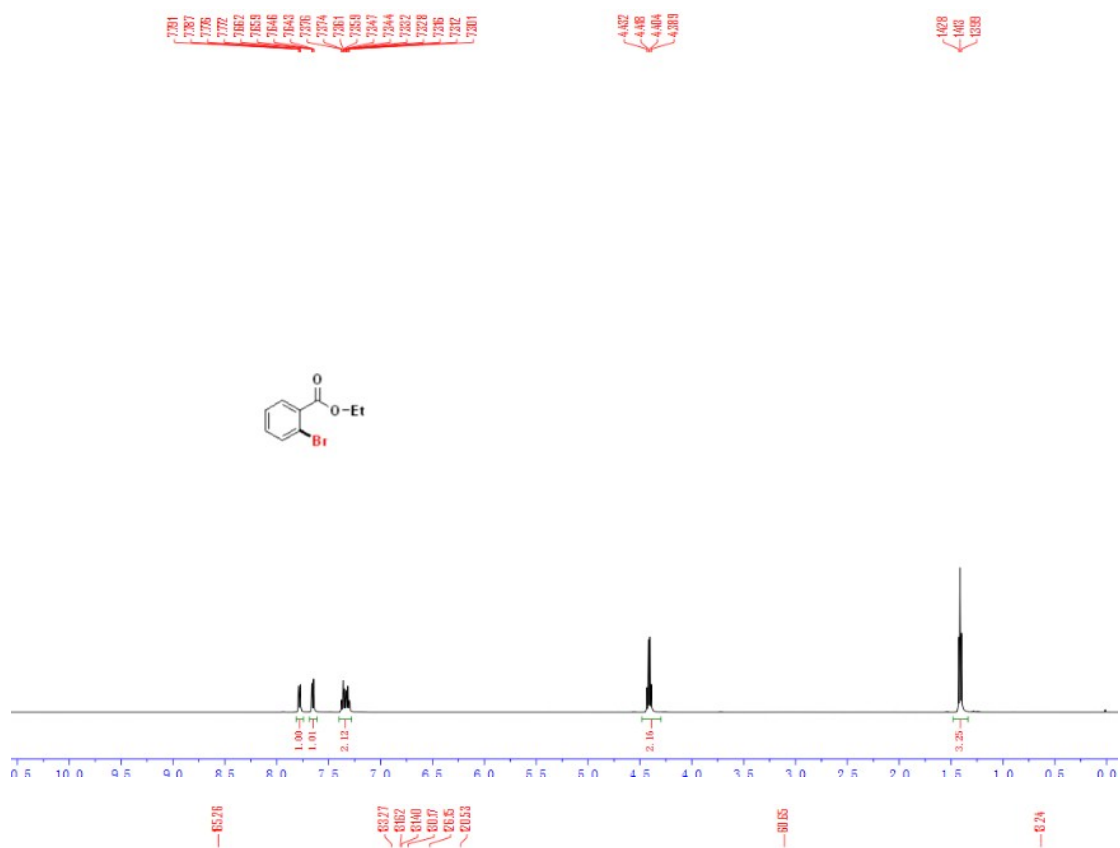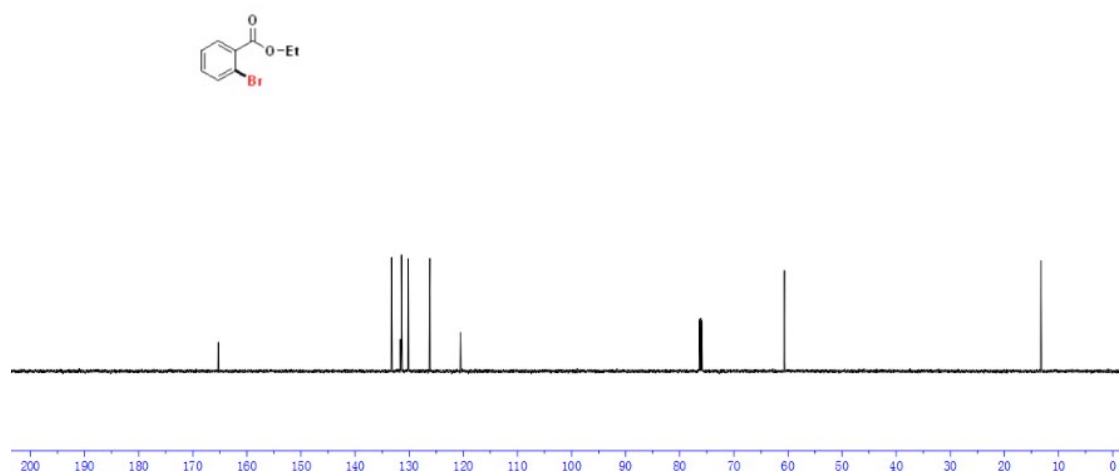

7.862  
7.846  
7.803  
7.800  
7.626  
7.601  
7.296  
7.237  
7.233  
7.227  
7.198  
7.164  
7.127  
7.129  
7.117  
7.114

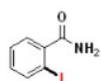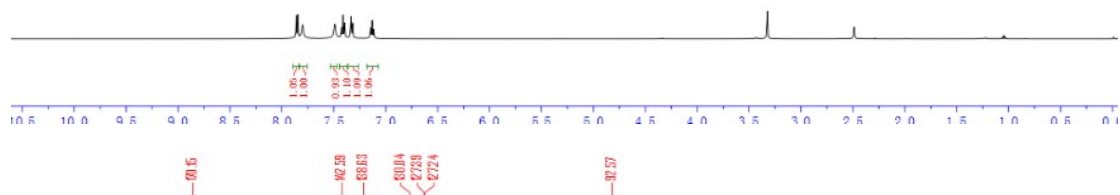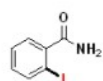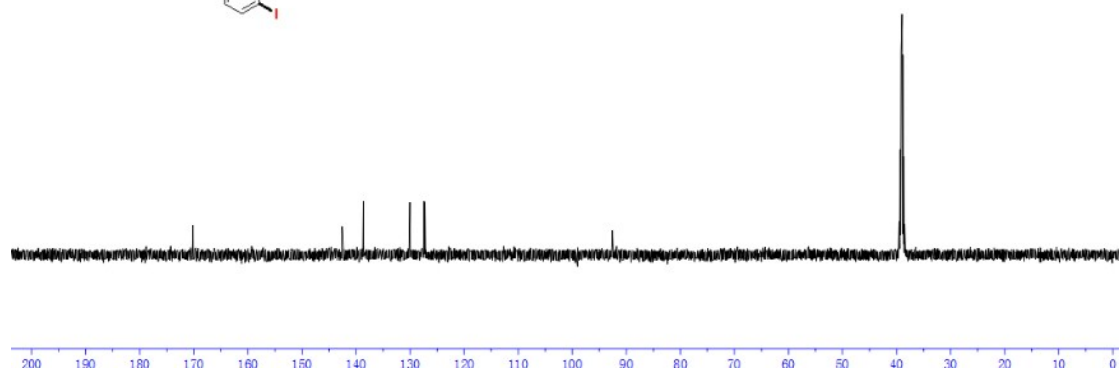

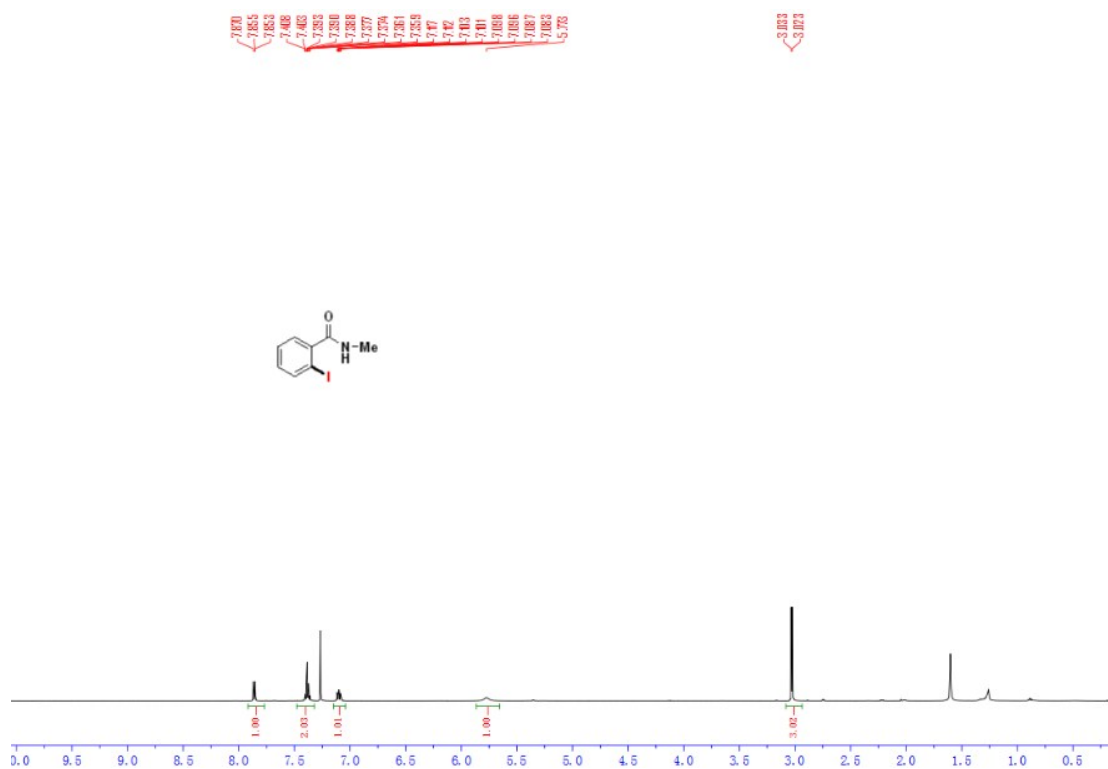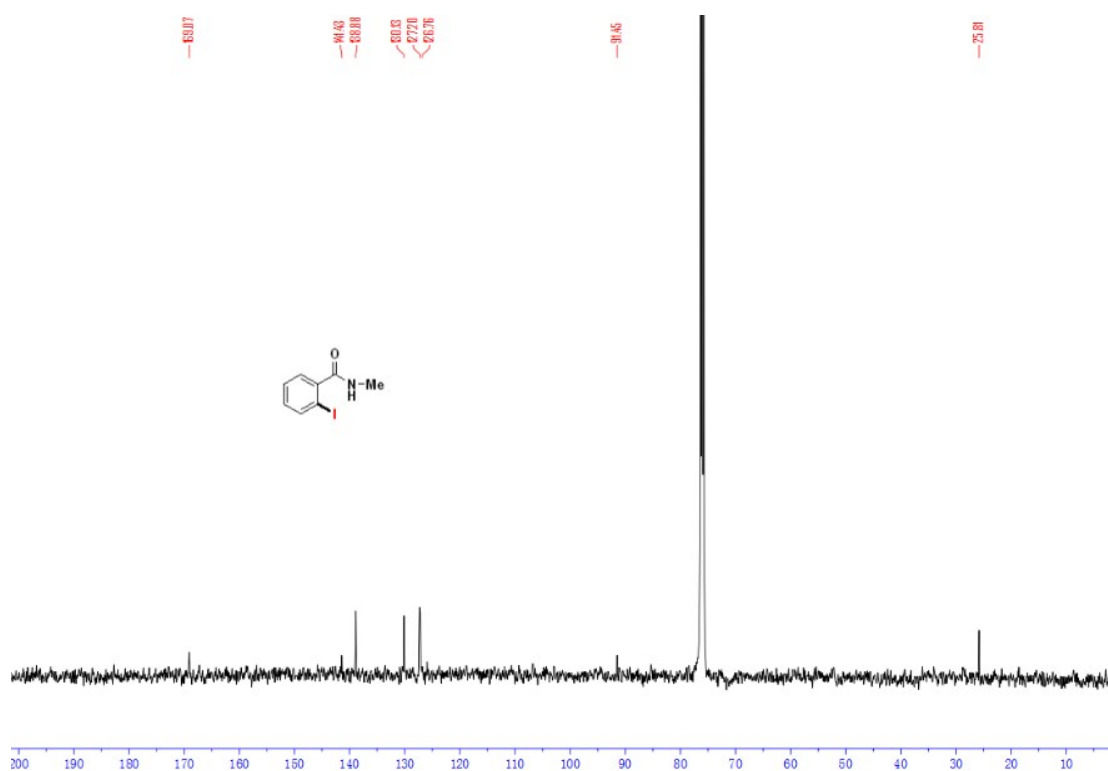

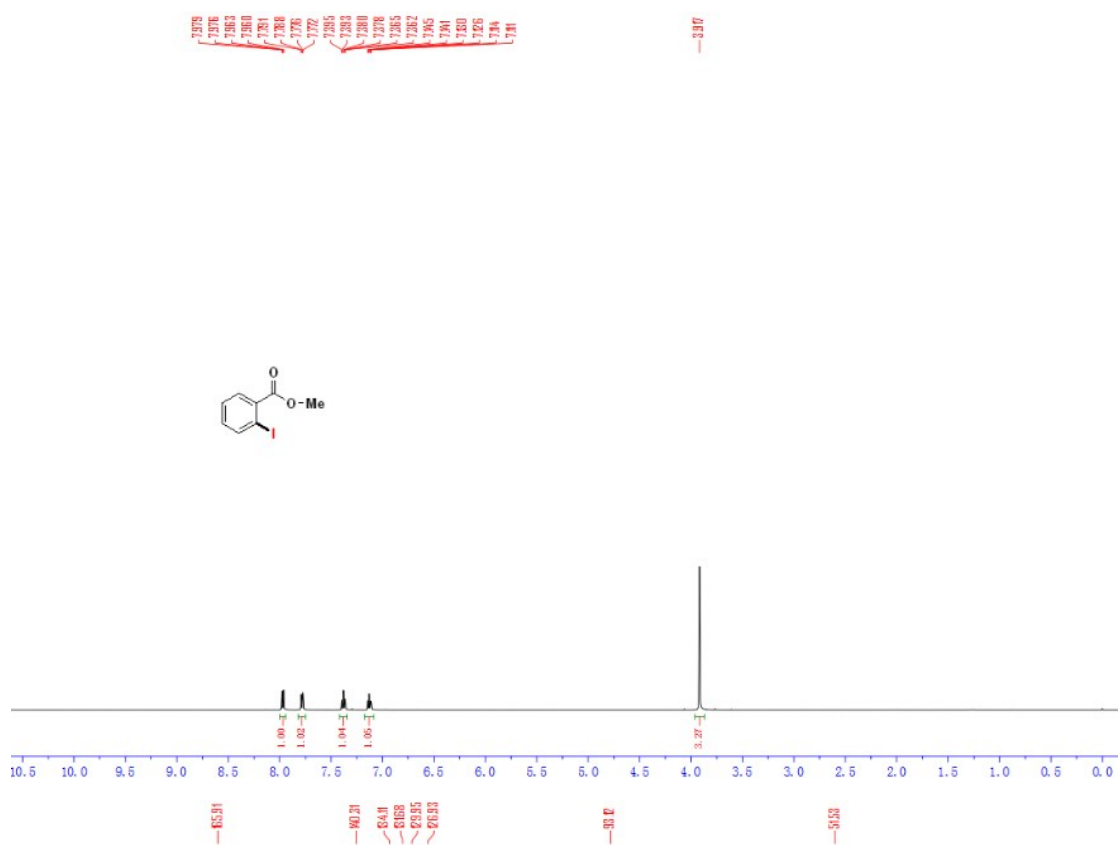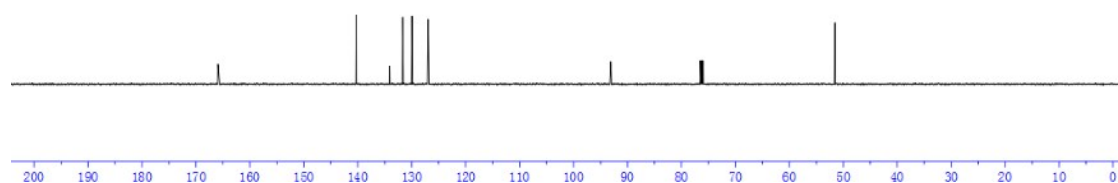

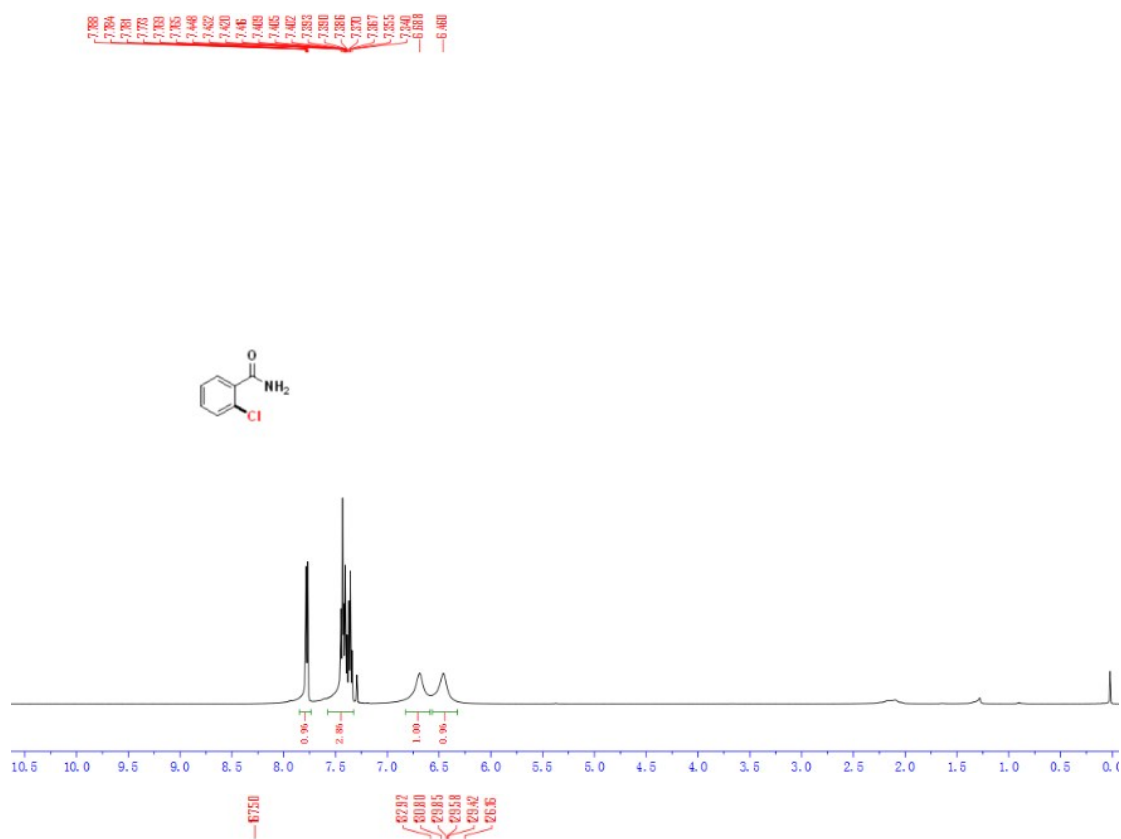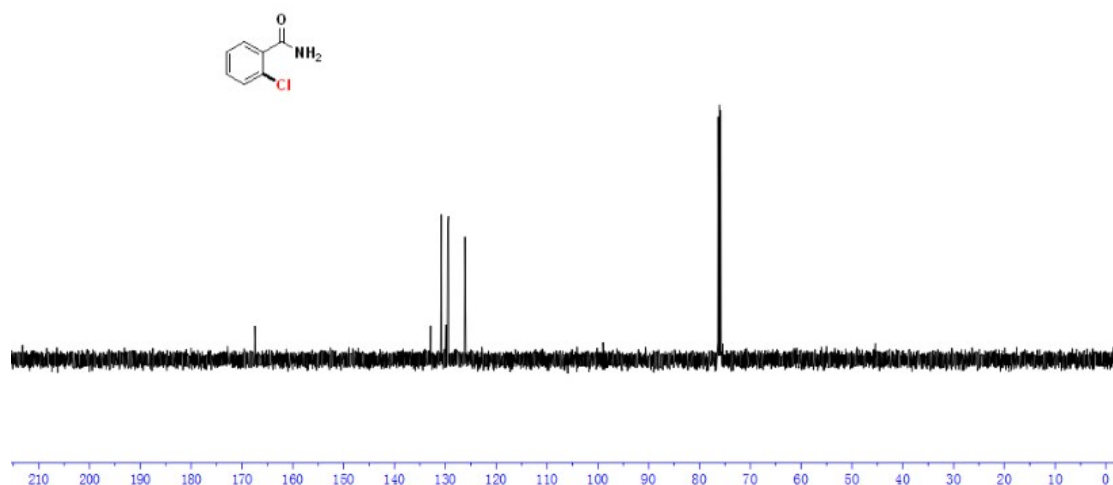



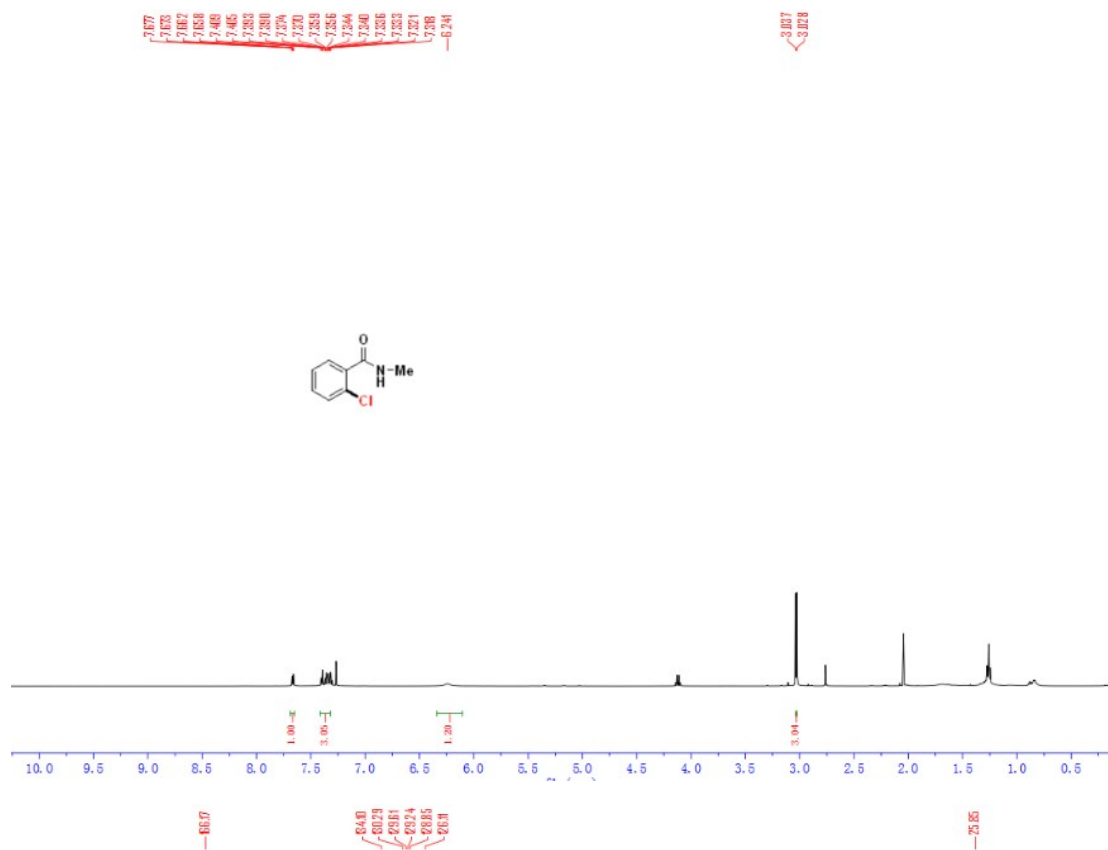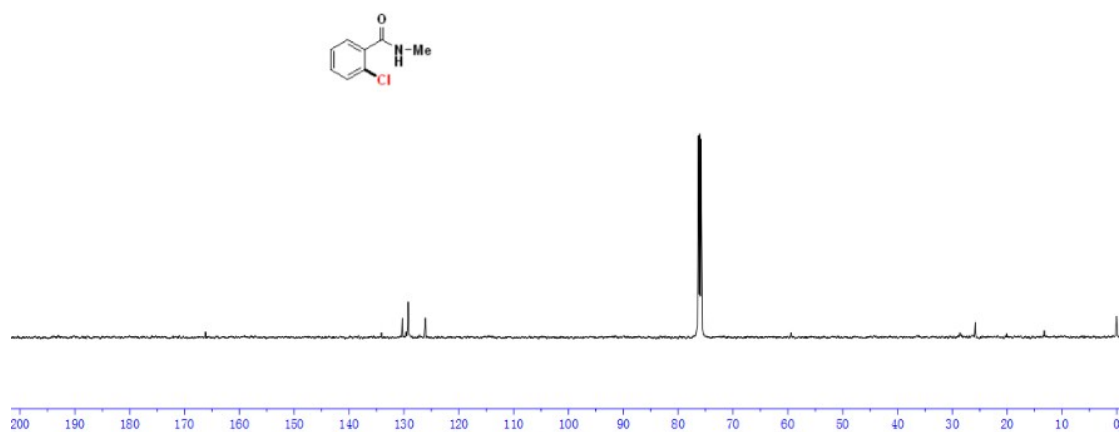

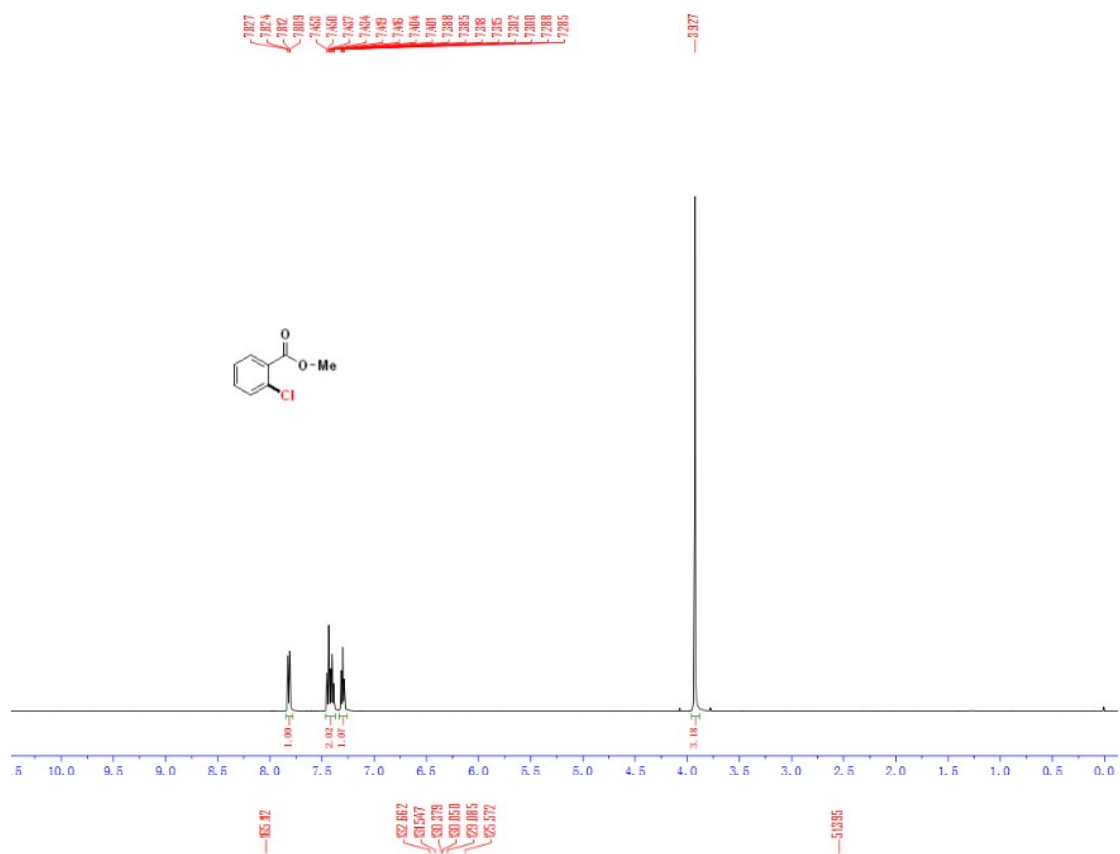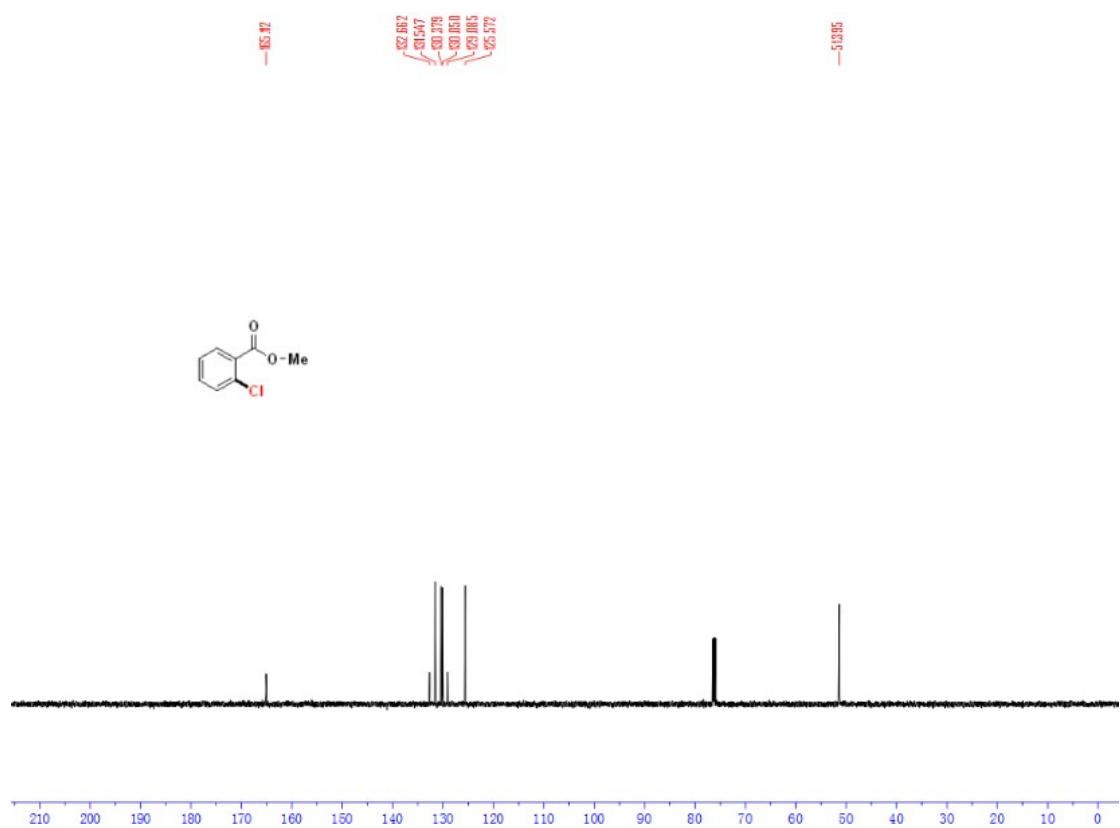

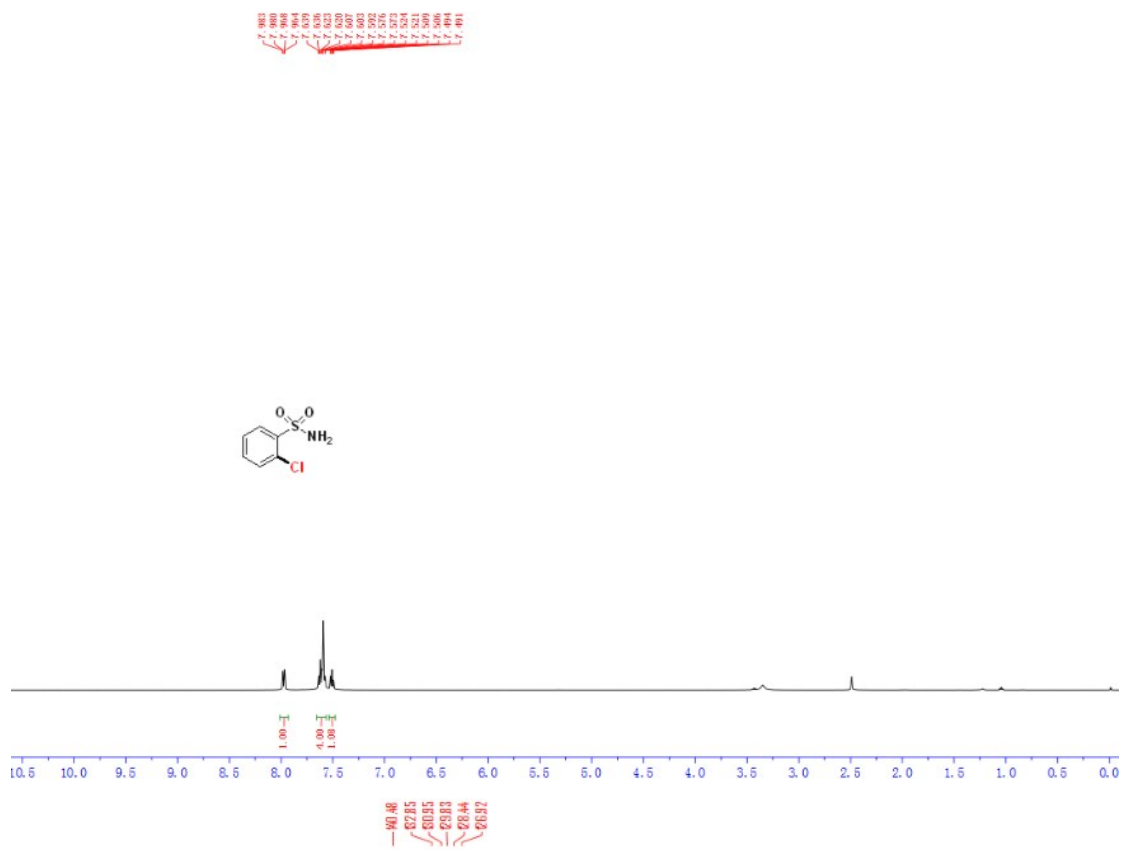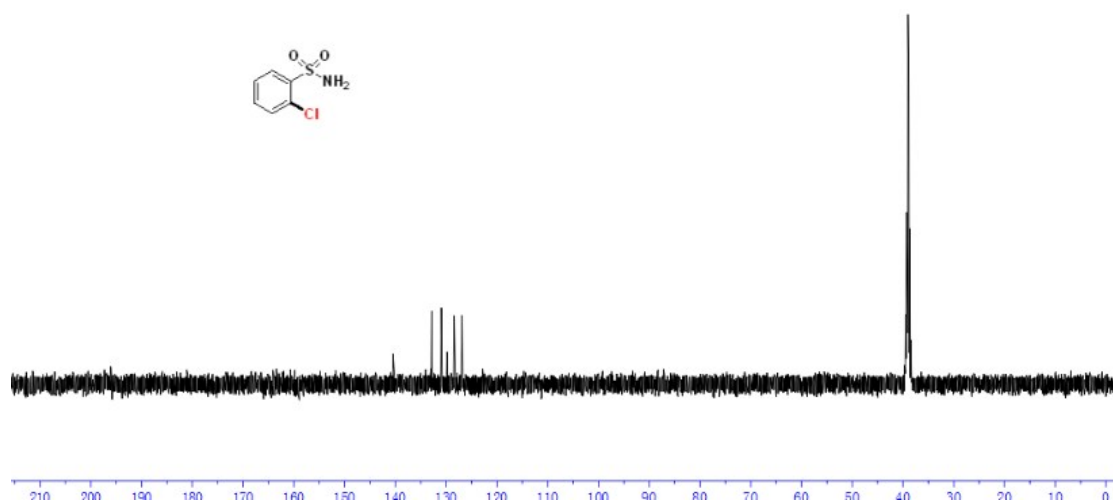

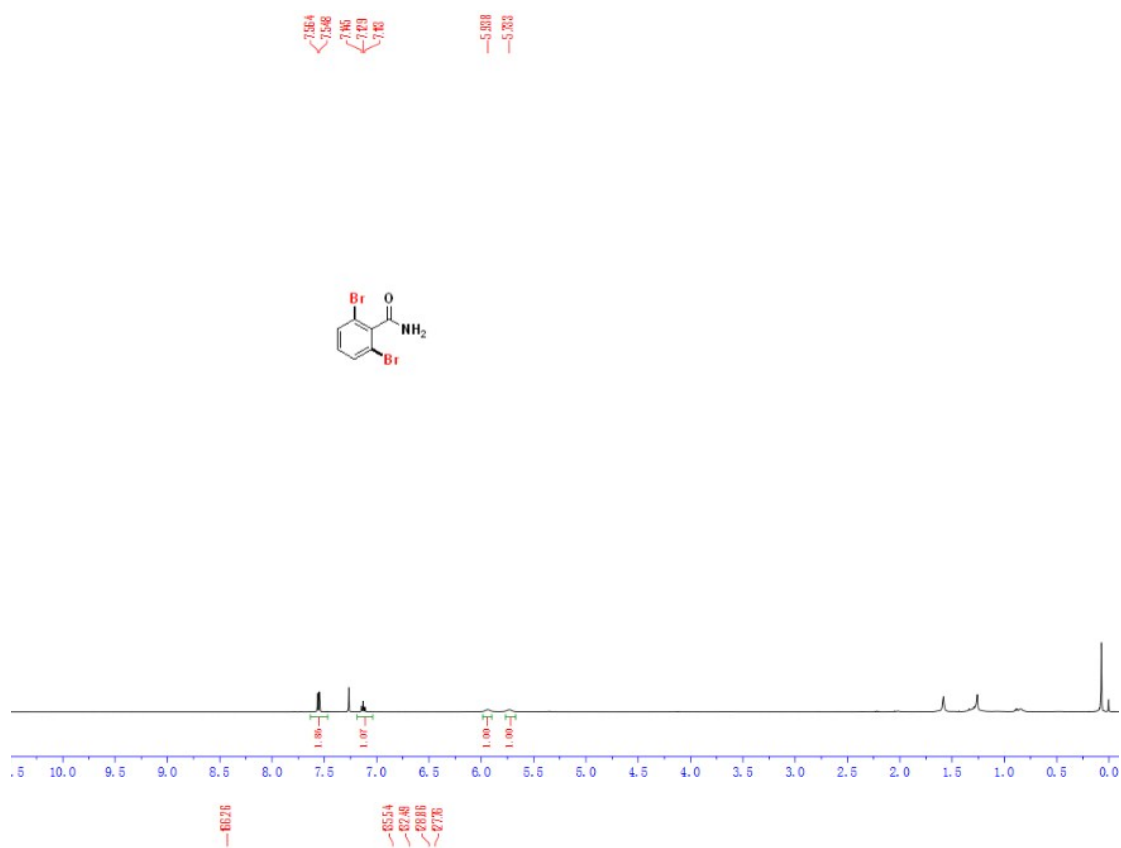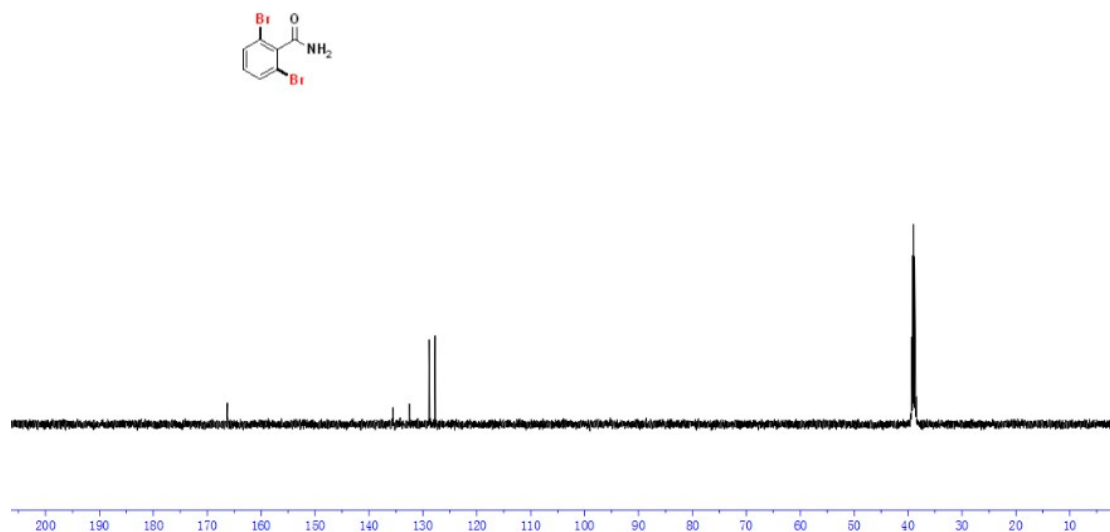

73.6  
60.2  
57.9

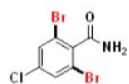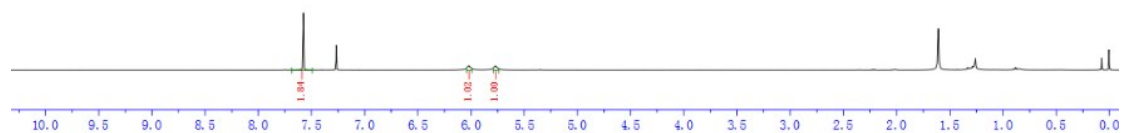

66.3  
66.3  
65.3  
60.5  
57.9

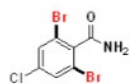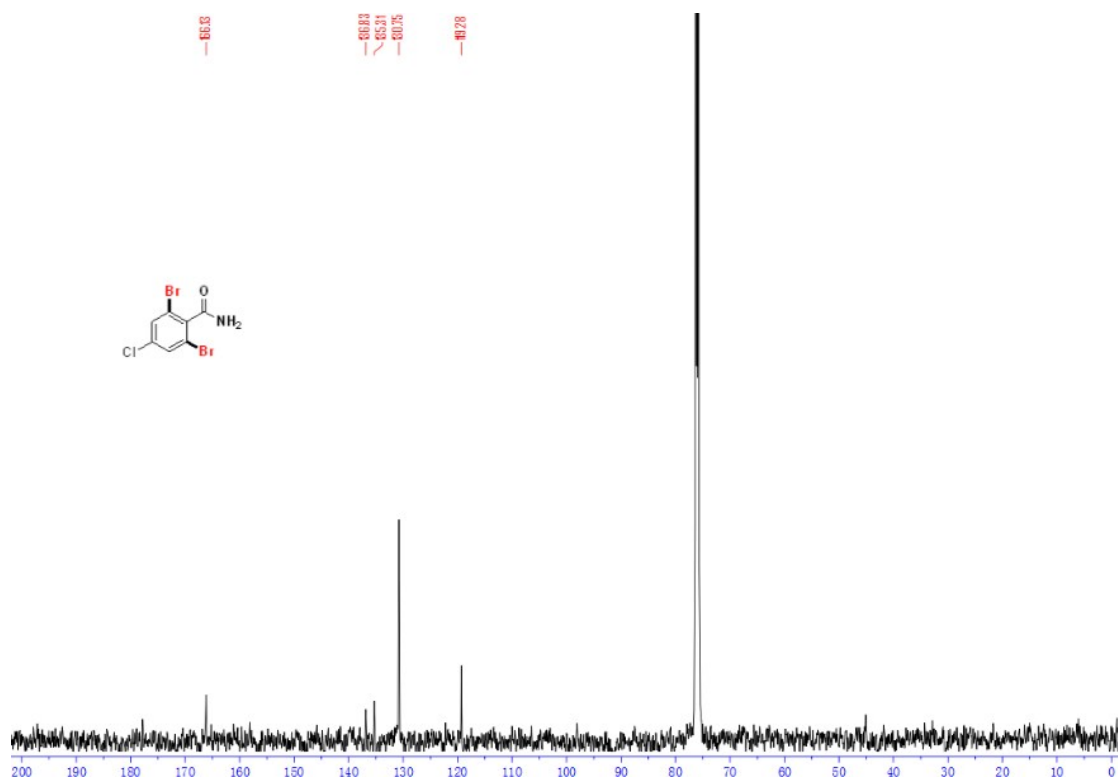

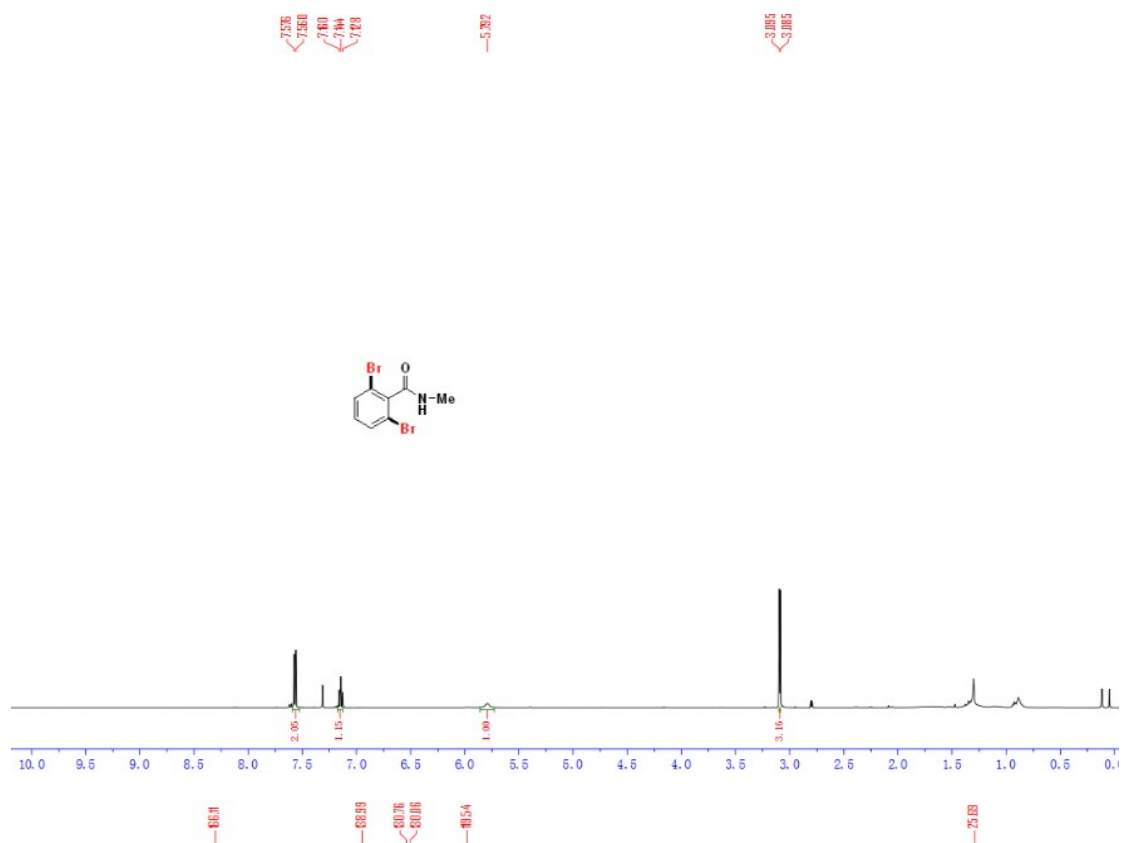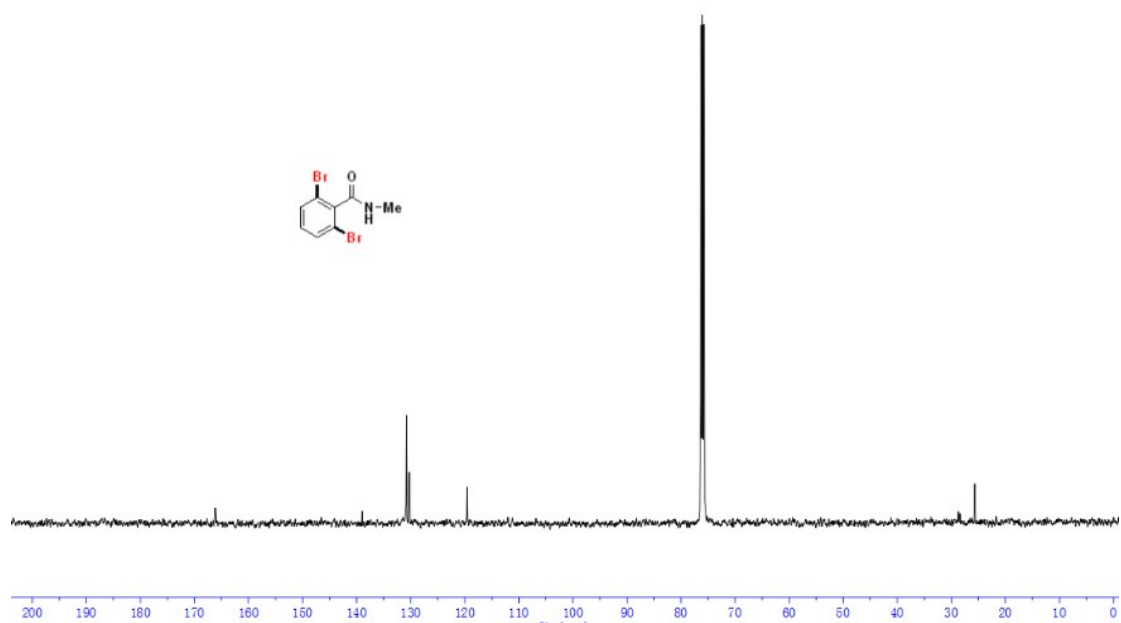

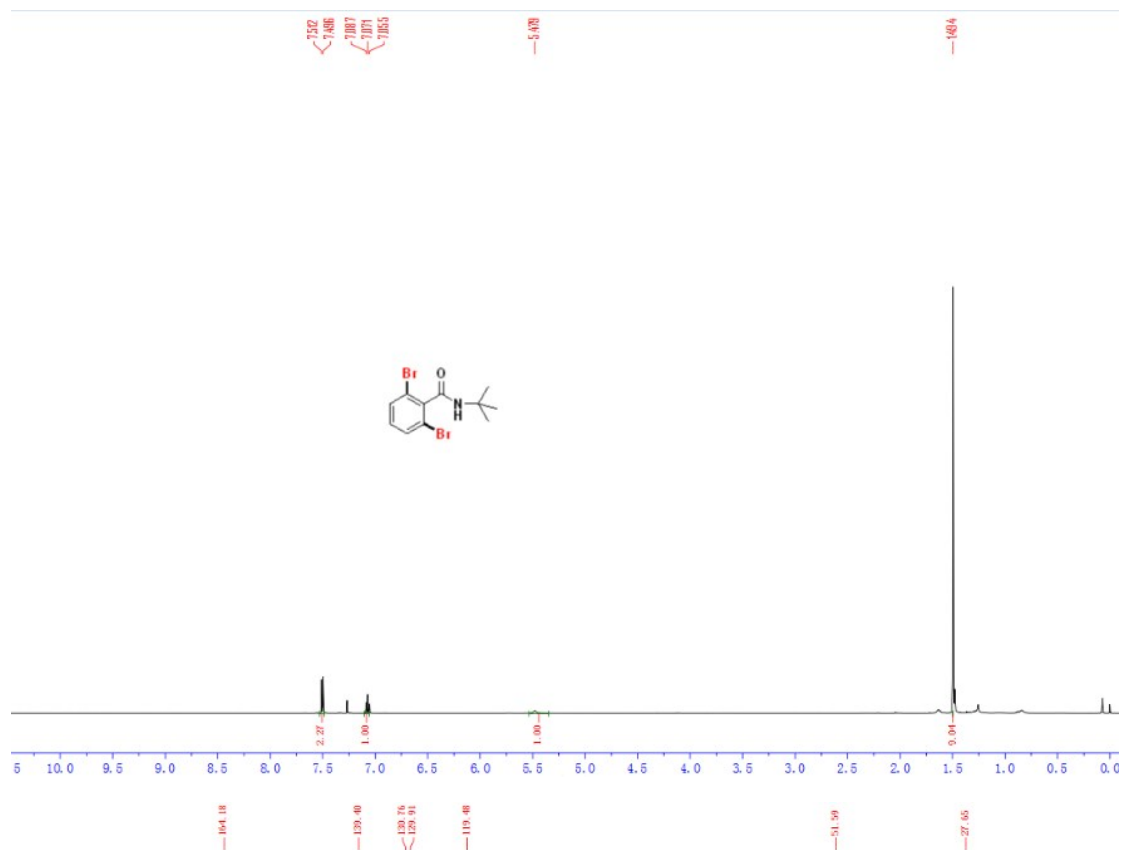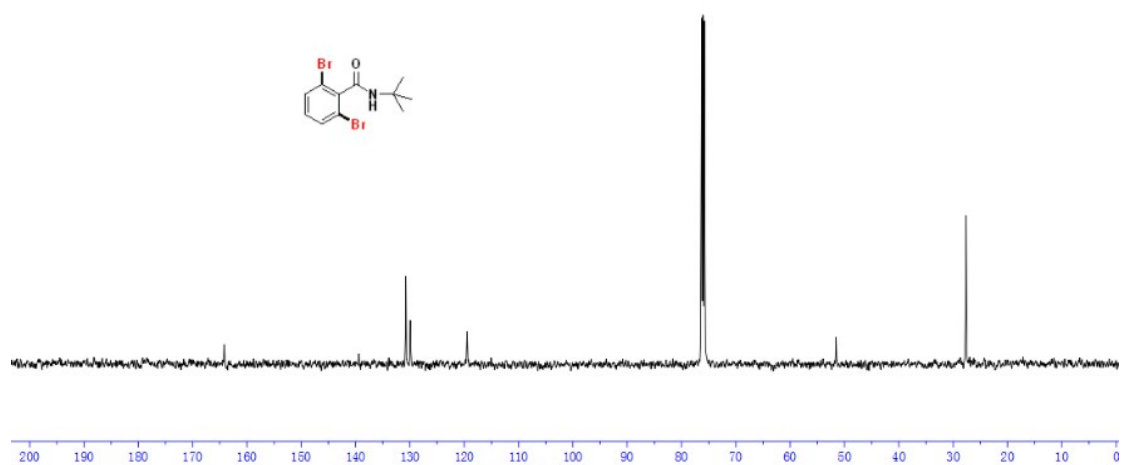

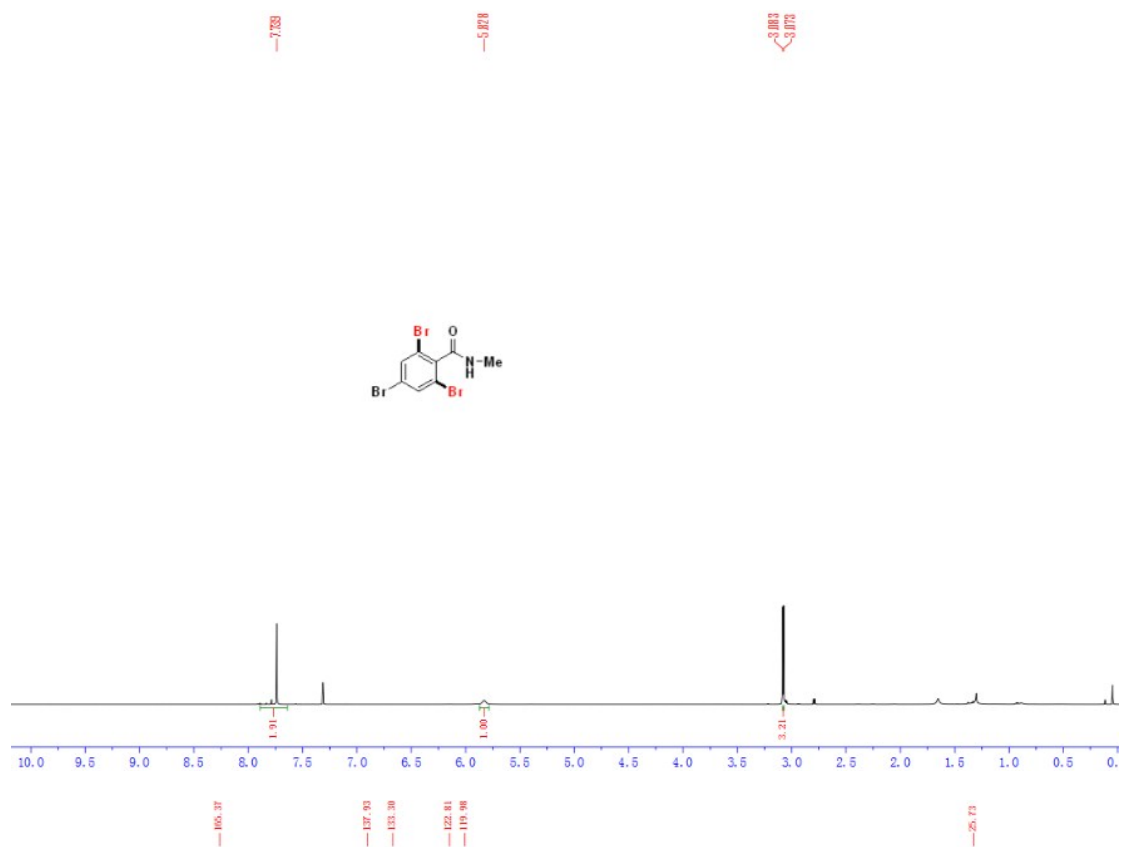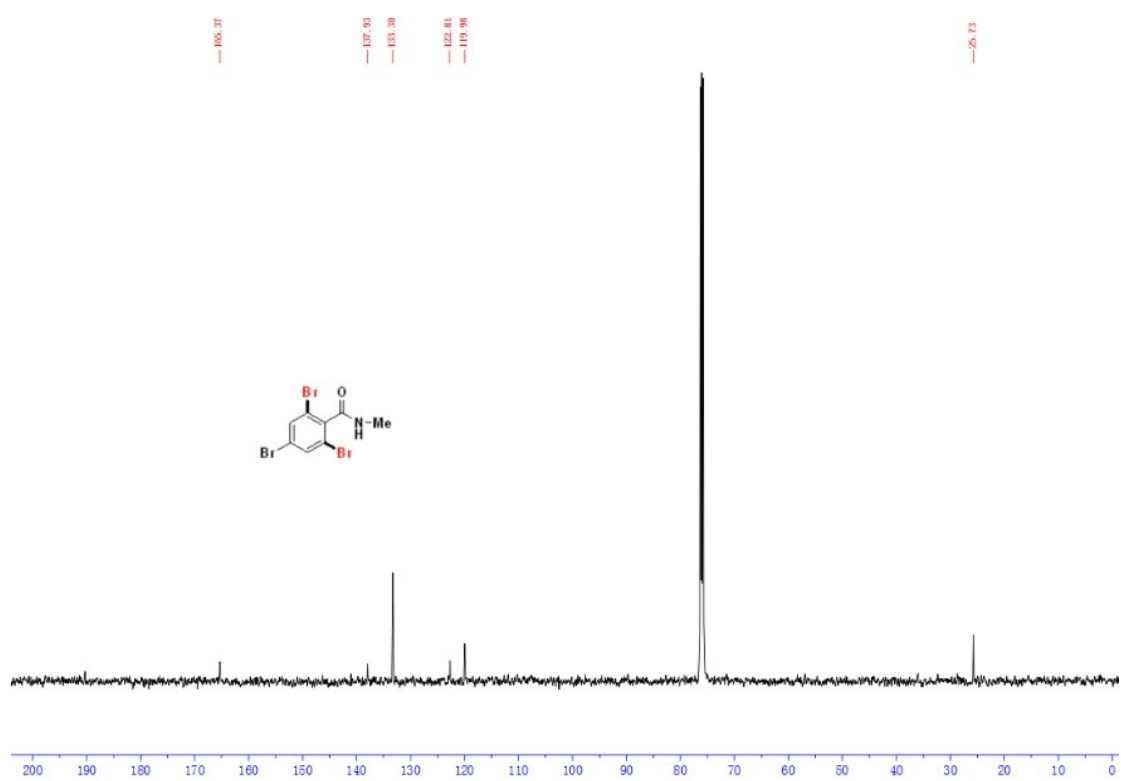



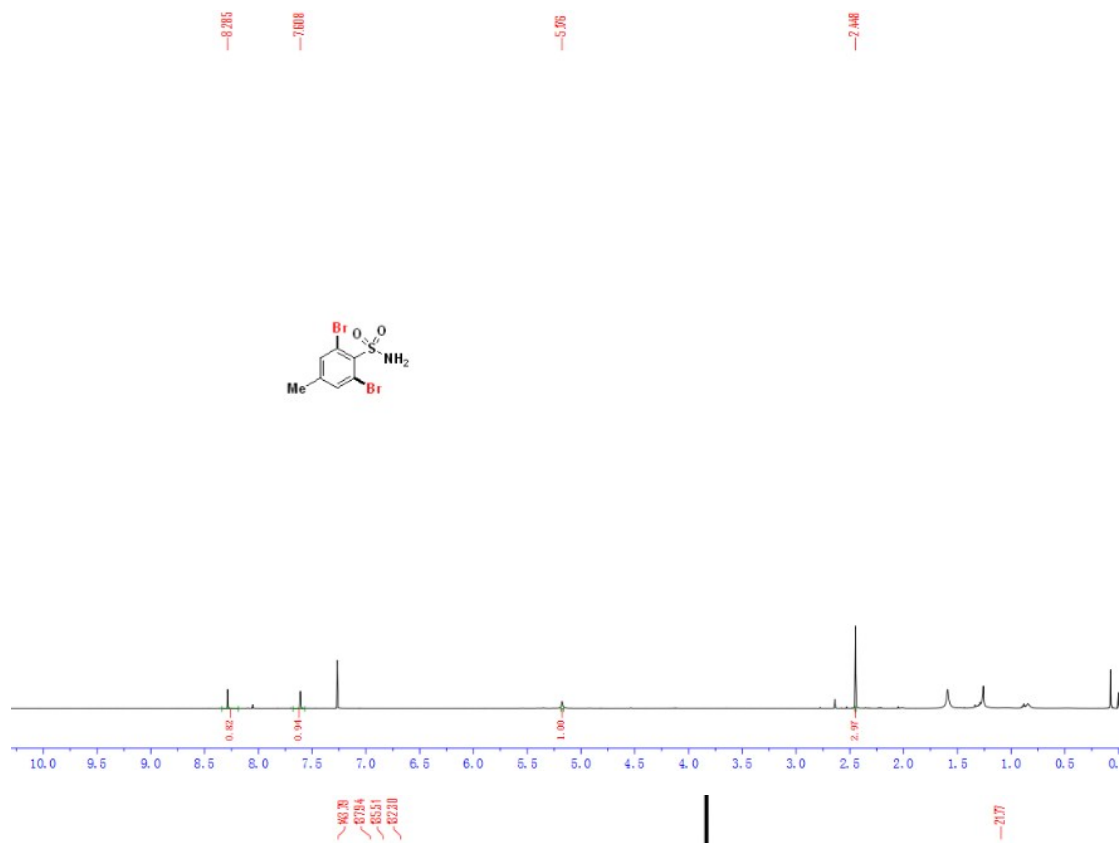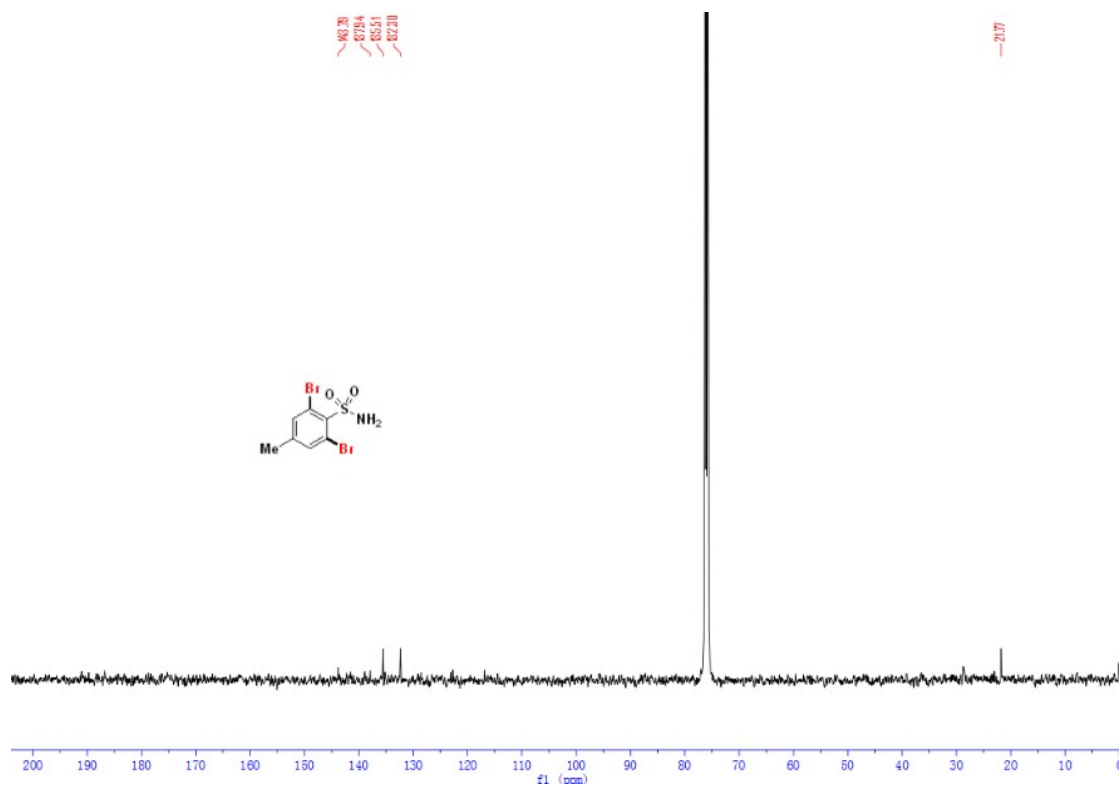

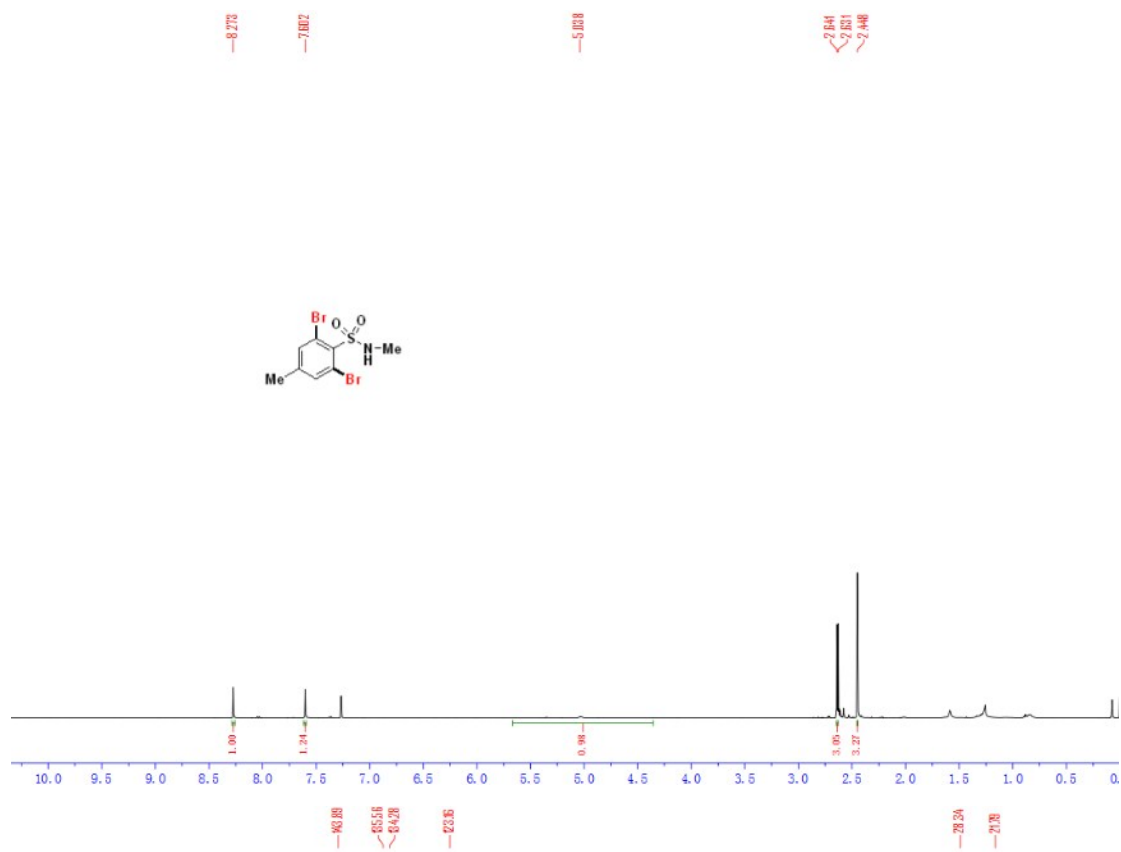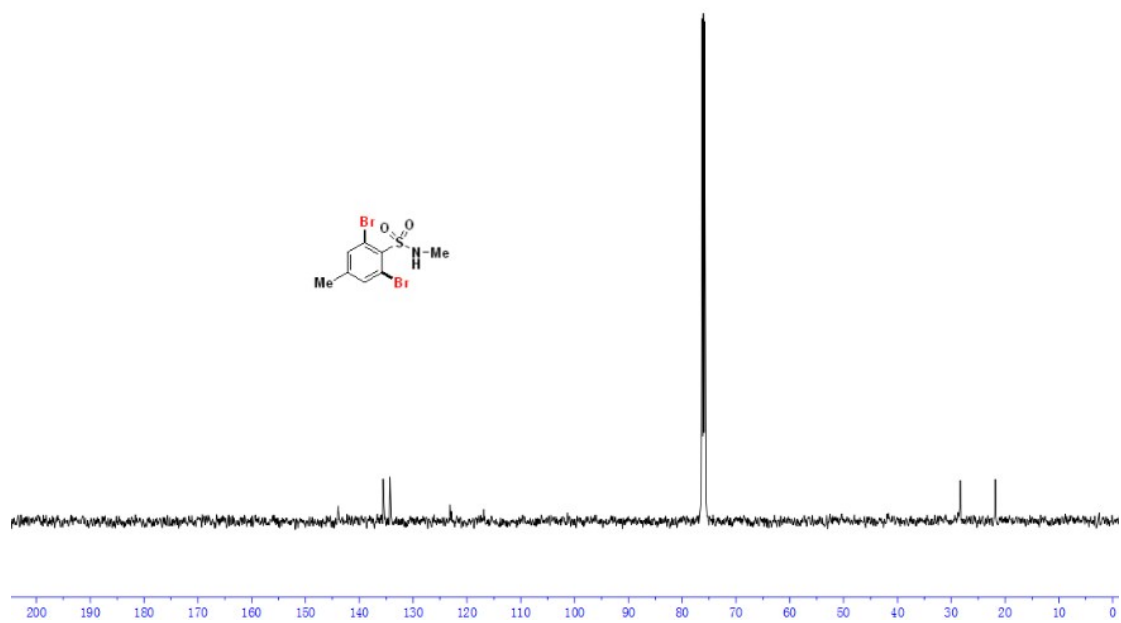

8.044  
7.771  
7.653  
7.651  
7.626  
7.377  
7.353  
7.352  
7.346

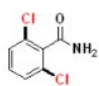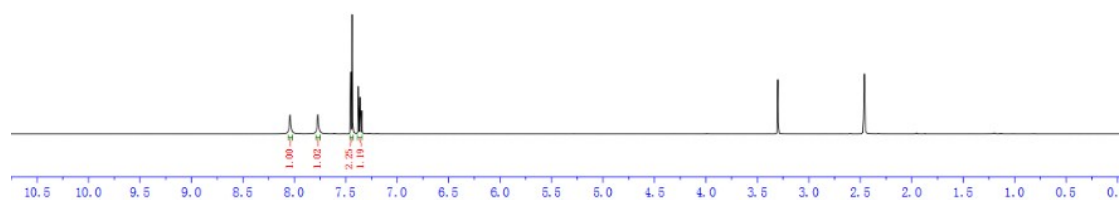

164.28  
136.51  
130.8  
130.08  
127.52

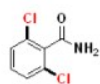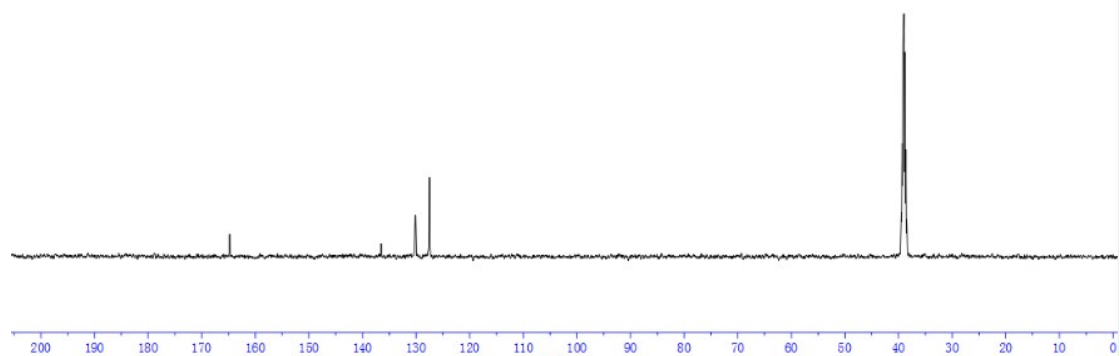

7.977  
7.973  
7.969  
7.794  
7.725  
7.676  
7.672  
7.660  
7.656  
7.652  
7.648  
7.621

6.80  
5.924

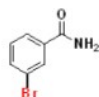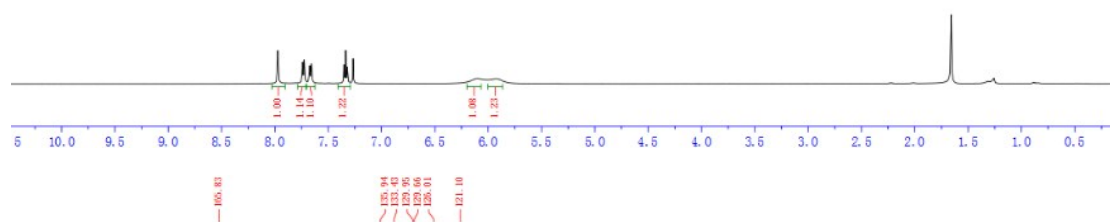

165.83  
135.94  
133.40  
132.46  
128.91  
121.10

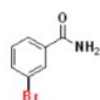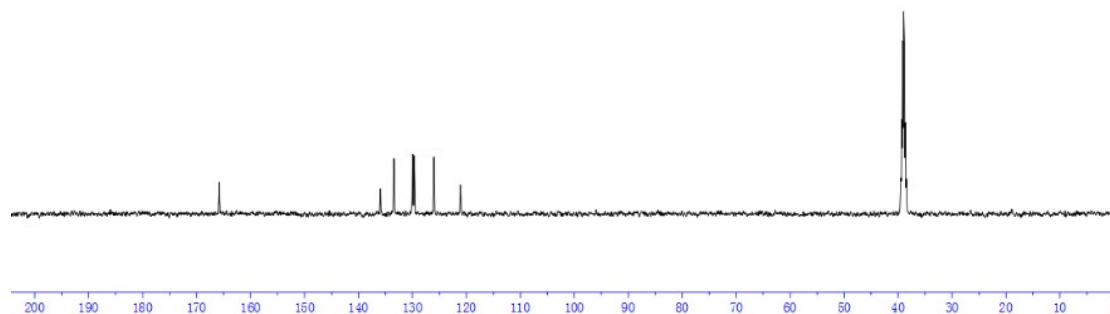

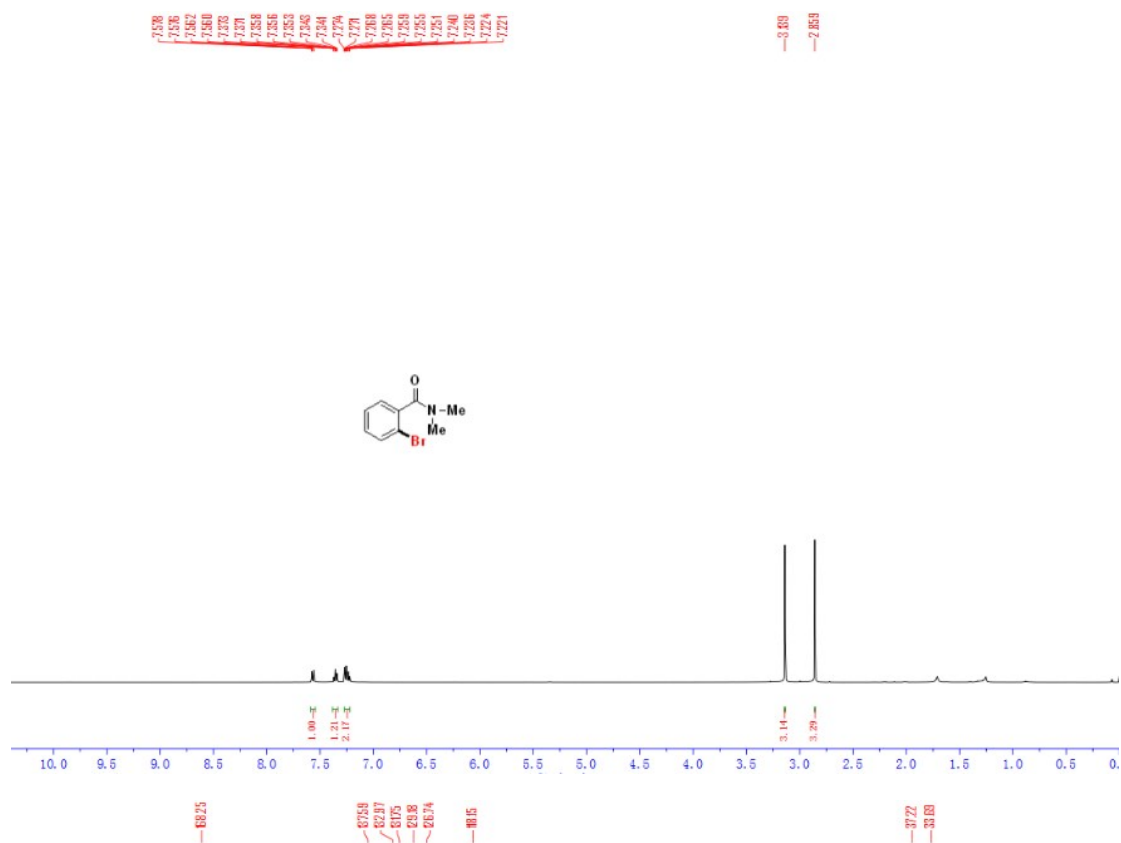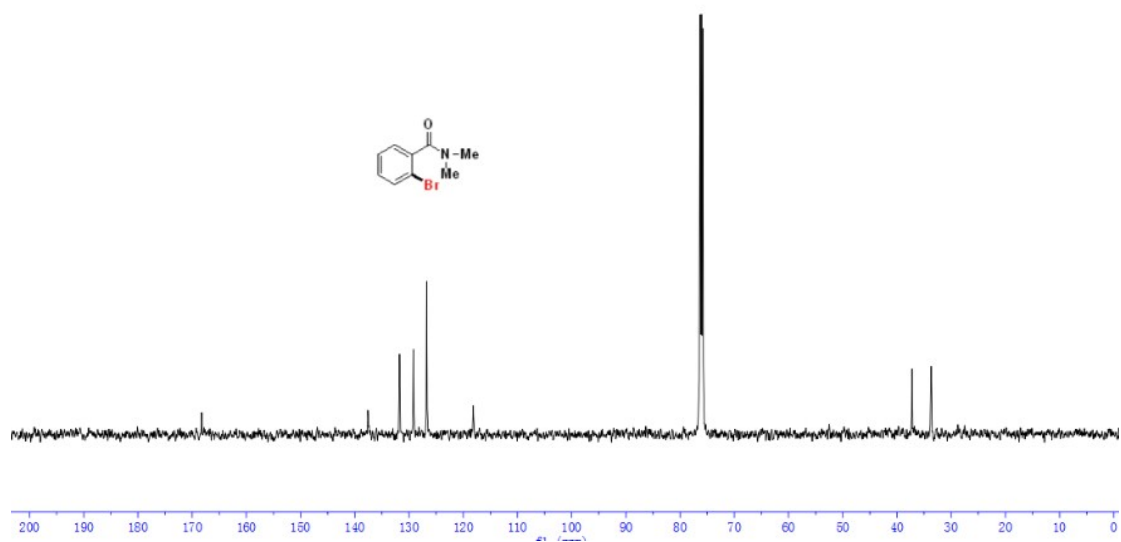

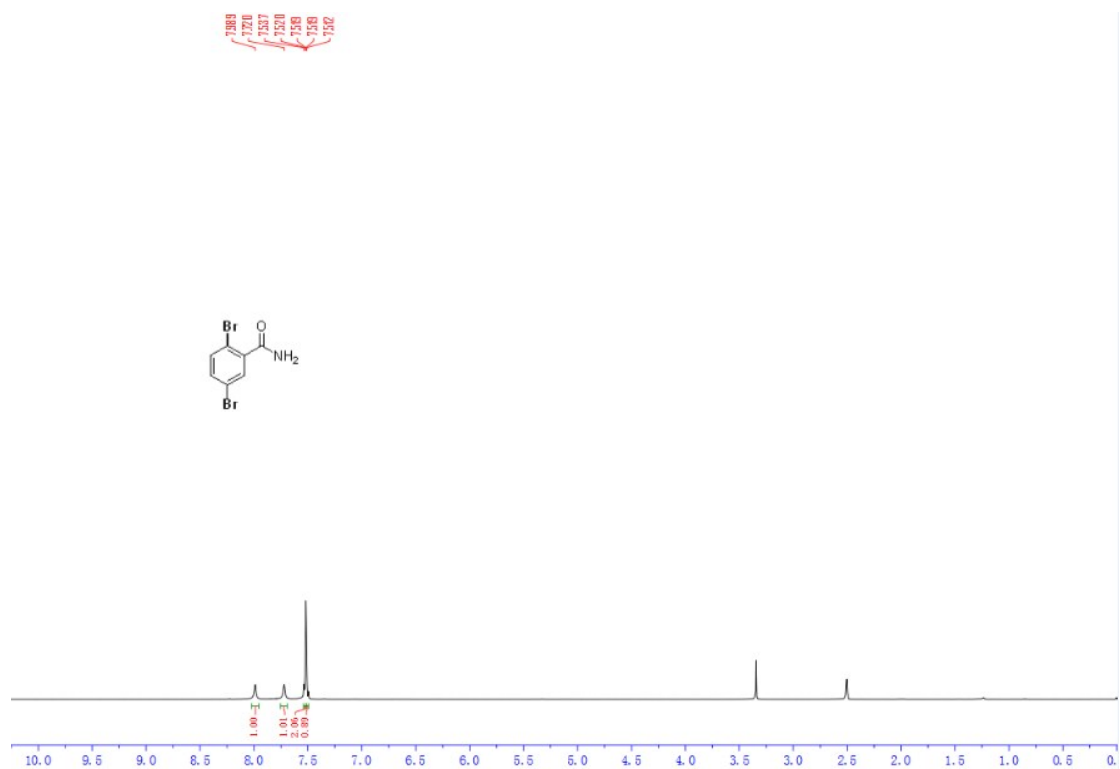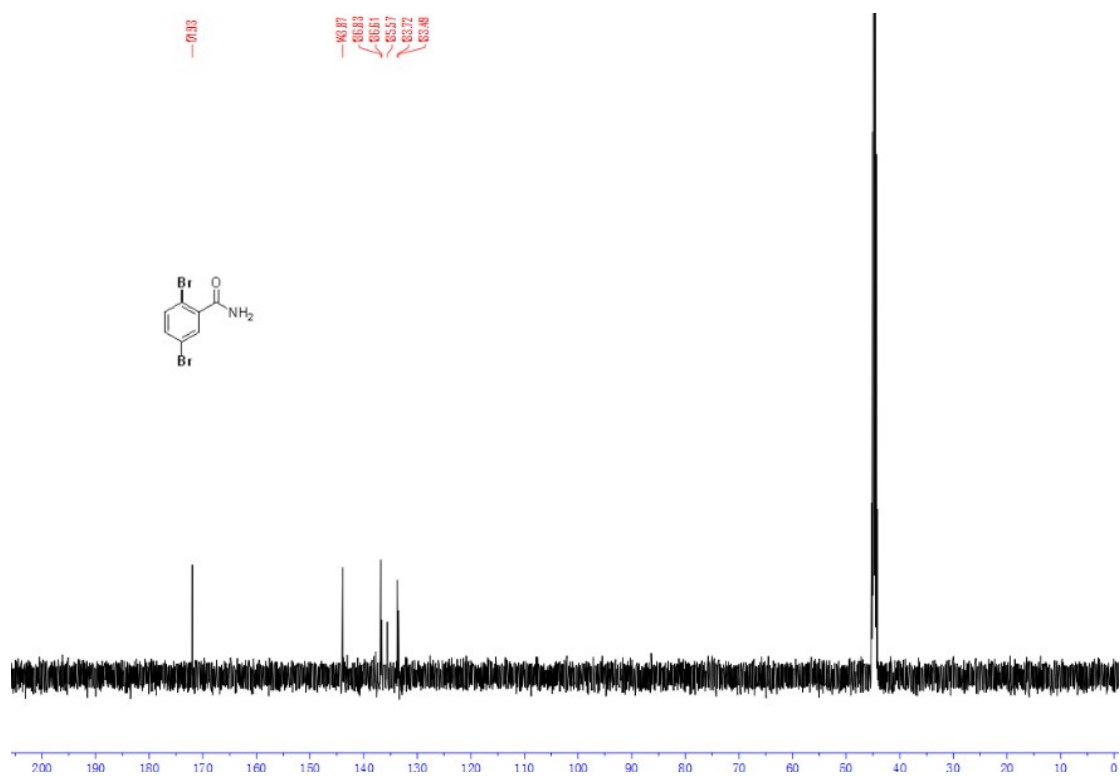

Supplement: c8nj06023a1.pdf [file c8nj06023a1.pdf]
